# Supplementary material
Source: Springer Nature journal article supplement (https://static-content.springer.com/esm/art:10.1140/epjds/s13688-016-0085-1/MediaObjects/13688_2016_85_MOESM1_ESM.pdf)
Supplement: MOESM1 [file 13688_2016_85_MOESM1_ESM.pdf]

## Full Results of Prediction Performance

*Authors:* Filipe Nunes Ribeiro, Matheus Araújo, Pollyanna Gonçalves, Marcos André  
Gonçalves, Fabrício Benevenuto  
*{filiperibeiro,mgoncalv,fabricio}@dcc.ufmg.br*  
*{matheus.ld.araujo,pollyannaogoncalves}@gmail.com*

Table 1: 2-classes experiments results with 4 datasets

| Dataset          | Method            | Accur.   | Posit. Sentiment |        |       | Negat. Sentiment |        |       | MacroF1 | Coverage |       |
|------------------|-------------------|----------|------------------|--------|-------|------------------|--------|-------|---------|----------|-------|
|                  |                   |          | P                | R      | F1    | P                | R      | F1    |         |          |       |
| Comments<br>_BBC | AFINN             | 66.56    | 23.08            | 81.08  | 35.93 | 96.32            | 64.66  | 77.38 | 56.65   | 85.11    |       |
|                  | ANEW_SUB          | 31.37    | 15.48            | 95.79  | 26.65 | 97.18            | 21.73  | 35.52 | 31.08   | 97.07    |       |
|                  | Emolex            | 59.64    | 21.52            | 89.04  | 34.67 | 97.38            | 55.62  | 70.80 | 52.73   | 80.72    |       |
|                  | Emoticons         | 33.33    | 0.00             | 0.00   | 0.00  | 100.00           | 33.33  | 50.00 | 25.00   | 0.40     |       |
|                  | Emoticons DS      | 13.33    | 13.10            | 100.00 | 23.17 | 100.00           | 0.31   | 0.61  | 11.89   | 99.73    |       |
|                  | NRC Hashtag       | 84.45    | 33.33            | 25.27  | 28.75 | 89.76            | 92.83  | 91.27 | 60.01   | 97.47    |       |
|                  | LIWC07            | 50.10    | 15.38            | 58.33  | 24.35 | 88.00            | 48.78  | 62.77 | 43.56   | 69.55    |       |
|                  | LIWC15            | 63.21    | 25.86            | 90.67  | 40.24 | 97.55            | 58.86  | 73.42 | 56.83   | 73.01    |       |
|                  | Opinion Finder    | 74.43    | 21.74            | 62.50  | 32.26 | 94.93            | 75.72  | 84.24 | 58.25   | 76.46    |       |
|                  | Opinion Lexicon   | 74.14    | 29.81            | 84.93  | 44.13 | 97.24            | 72.66  | 83.17 | 63.65   | 80.72    |       |
|                  | PANAS-t           | 58.73    | 20.00            | 75.00  | 31.58 | 93.94            | 56.36  | 70.45 | 51.02   | 8.38     |       |
|                  | Pattern.en        | 41.75    | 19.73            | 93.55  | 32.58 | 96.61            | 32.57  | 48.72 | 40.65   | 54.79    |       |
|                  | SANN              | 52.60    | 18.33            | 80.49  | 29.86 | 94.56            | 48.60  | 64.20 | 47.03   | 43.48    |       |
|                  | SASA              | 61.61    | 23.50            | 66.20  | 34.69 | 90.80            | 60.77  | 72.81 | 53.75   | 61.30    |       |
|                  | Semantria         | 83.43    | 40.00            | 84.75  | 54.35 | 97.64            | 83.26  | 89.88 | 72.11   | 67.42    |       |
|                  | SenticNet         | 66.07    | 24.44            | 74.16  | 36.77 | 94.24            | 64.83  | 76.81 | 56.79   | 88.96    |       |
|                  | Sentiment140      | 68.51    | 24.00            | 69.77  | 35.71 | 94.04            | 68.33  | 79.15 | 57.43   | 45.61    |       |
|                  | Sentiment140.L    | 56.85    | 18.52            | 69.15  | 29.21 | 92.35            | 55.03  | 68.97 | 49.09   | 97.07    |       |
|                  | SentiStrength     | 93.93    | 64.29            | 78.26  | 70.59 | 97.72            | 95.54  | 96.61 | 83.60   | 32.85    |       |
|                  | SentiWordNet      | 57.49    | 20.00            | 88.06  | 32.60 | 97.13            | 53.45  | 68.96 | 50.78   | 76.33    |       |
|                  | SO-CAL            | 75.28    | 28.93            | 80.28  | 42.54 | 96.71            | 74.64  | 84.25 | 63.40   | 82.85    |       |
|                  | Stanford DM       | 89.45    | 63.16            | 40.91  | 49.66 | 91.81            | 96.52  | 94.11 | 71.88   | 92.02    |       |
|                  | Umigon            | 79.37    | 39.13            | 61.02  | 47.68 | 92.10            | 82.72  | 87.15 | 67.42   | 50.93    |       |
|                  | VADER             | 62.76    | 22.68            | 85.54  | 35.86 | 96.75            | 59.60  | 73.76 | 54.81   | 90.69    |       |
|                  | Comments<br>_Digg | AFINN    | 70.94            | 47.01  | 81.82 | 59.72            | 91.17  | 67.05 | 77.27   | 68.49    | 74.81 |
|                  |                   | ANEW_SUB | 43.25            | 30.98  | 92.31 | 46.39            | 90.13  | 25.46 | 39.71   | 43.05    | 93.73 |
|                  |                   | Emolex   | 61.71            | 34.60  | 75.83 | 47.52            | 88.93  | 57.53 | 69.87   | 58.69    | 67.14 |
| Emoticons        |                   | 73.08    | 72.22            | 86.67  | 78.79 | 75.00            | 54.55  | 63.16 | 70.97   | 3.32     |       |
| Emoticons DS     |                   | 28.24    | 27.30            | 100.00 | 42.89 | 100.00           | 1.77   | 3.48  | 23.19   | 98.72    |       |
| NRC Hashtag      |                   | 74.69    | 51.01            | 40.64  | 45.24 | 80.80            | 86.48  | 83.54 | 64.39   | 92.97    |       |
| LIWC07           |                   | 46.15    | 27.44            | 58.40  | 37.34 | 72.49            | 41.52  | 52.79 | 45.07   | 58.18    |       |
| LIWC15           |                   | 70.67    | 49.81            | 90.91  | 64.36 | 94.35            | 62.36  | 75.09 | 69.72   | 62.79    |       |
| Opinion Finder   |                   | 71.14    | 43.04            | 64.76  | 51.71 | 86.88            | 73.13  | 79.42 | 65.56   | 56.27    |       |
| Opinion Lexicon  |                   | 71.82    | 47.45            | 86.43  | 61.27 | 93.40            | 66.75  | 77.86 | 69.56   | 69.44    |       |
| PANAS-t          |                   | 68.00    | 12.50            | 50.00  | 20.00 | 94.12            | 69.57  | 80.00 | 50.00   | 3.20     |       |
| Pattern.en       |                   | 60.05    | 43.73            | 92.14  | 59.31 | 92.57            | 45.21  | 60.75 | 60.03   | 56.65    |       |
| SANN             |                   | 55.98    | 36.06            | 80.65  | 49.83 | 86.67            | 46.80  | 60.78 | 55.31   | 43.86    |       |
| SASA             |                   | 65.54    | 40.26            | 66.91  | 50.27 | 84.82            | 65.06  | 73.64 | 61.95   | 68.29    |       |
| Semantria        |                   | 82.46    | 62.72            | 88.33  | 73.36 | 94.81            | 80.25  | 86.93 | 80.14   | 56.14    |       |
| SenticNet        |                   | 69.40    | 46.30            | 72.46  | 56.50 | 86.77            | 68.25  | 76.40 | 66.45   | 96.55    |       |
| Sentiment140     |                   | 85.06    | 62.50            | 78.95  | 69.77 | 93.65            | 86.76  | 90.08 | 79.92   | 33.38    |       |
| Sentiment140.L   |                   | 67.76    | 42.07            | 73.45  | 53.50 | 88.01            | 65.84  | 75.33 | 64.41   | 89.64    |       |
| SentiStrength    |                   | 92.09    | 78.69            | 92.31  | 84.96 | 97.40            | 92.02  | 94.64 | 89.80   | 27.49    |       |
| SentiWordNet     |                   | 62.17    | 36.86            | 77.68  | 50.00 | 88.84            | 57.18  | 69.58 | 59.79   | 58.82    |       |
| SO-CAL           |                   | 76.55    | 52.86            | 77.08  | 62.71 | 90.65            | 76.37  | 82.90 | 72.81   | 71.99    |       |
| Stanford DM      |                   | 69.16    | 35.29            | 20.27  | 25.75 | 75.21            | 86.68  | 80.54 | 53.15   | 78.90    |       |
| Umigon           |                   | 83.37    | 66.22            | 75.38  | 70.50 | 90.72            | 86.23  | 88.42 | 79.46   | 63.04    |       |
| VADER            |                   | 69.05    | 45.48            | 85.88  | 59.47 | 92.55            | 63.00  | 74.97 | 67.22   | 82.23    |       |
| Comments<br>_NYT |                   | AFINN    | 73.82            | 66.35  | 78.85 | 72.07            | 81.55  | 70.04 | 75.36   | 73.71    | 55.14 |
|                  |                   | ANEW_SUB | 56.33            | 50.82  | 92.91 | 65.70            | 81.96  | 26.38 | 39.92   | 52.81    | 94.36 |
|                  |                   | Emolex   | 64.57            | 57.20  | 81.71 | 67.29            | 77.52  | 50.78 | 61.36   | 64.33    | 65.69 |
|                  | Emoticons         | 0.00     | 0.00             | 0.00   | 0.00  | 0.00             | 0.00   | 0.00  | 0.00    | 0.00     |       |
|                  | Emoticons DS      | 44.75    | 44.66            | 99.86  | 61.72 | 78.57            | 0.40   | 0.80  | 31.26   | 99.84    |       |
|                  | NRC Hashtag       | 61.89    | 58.47            | 49.85  | 53.82 | 63.98            | 71.55  | 67.55 | 60.69   | 91.77    |       |
|                  | LIWC07            | 49.52    | 44.96            | 59.96  | 51.39 | 56.18            | 41.15  | 47.50 | 49.44   | 46.30    |       |
|                  | LIWC15            | 73.35    | 66.72            | 83.85  | 74.31 | 82.43            | 64.42  | 72.32 | 73.31   | 46.58    |       |
|                  | Opinion Finder    | 75.11    | 70.17            | 61.61  | 65.61 | 77.64            | 83.58  | 80.50 | 73.06   | 35.26    |       |
|                  | Opinion Lexicon   | 74.61    | 67.54            | 77.95  | 72.37 | 81.46            | 72.12  | 76.50 | 74.44   | 57.80    |       |
|                  | PANAS-t           | 66.32    | 71.05            | 56.25  | 62.79 | 63.16            | 76.60  | 69.23 | 66.01   | 1.92     |       |
|                  | Pattern.en        | 62.11    | 57.23            | 86.05  | 68.74 | 75.15            | 39.63  | 51.89 | 60.32   | 48.18    |       |
|                  | SANN              | 66.88    | 58.26            | 80.76  | 67.69 | 79.57            | 56.43  | 66.03 | 66.86   | 37.18    |       |
|                  | SASA              | 56.47    | 51.55            | 58.92  | 54.99 | 61.70            | 54.45  | 57.85 | 56.42   | 50.49    |       |
|                  | Semantria         | 77.72    | 72.66            | 77.67  | 75.08 | 82.07            | 77.76  | 79.86 | 77.47   | 55.54    |       |
|                  | SenticNet         | 65.11    | 61.15            | 59.65  | 60.39 | 68.16            | 69.51  | 68.83 | 64.61   | 99.68    |       |
|                  | Sentiment140      | 78.10    | 79.37            | 61.22  | 69.12 | 77.54            | 89.37  | 83.04 | 76.08   | 12.37    |       |
|                  | Sentiment140.L    | 63.48    | 57.91            | 66.34  | 61.84 | 69.30            | 61.17  | 64.98 | 63.41   | 89.02    |       |
|                  | SentiStrength     | 81.42    | 79.50            | 62.71  | 70.11 | 82.15            | 91.39  | 86.52 | 78.32   | 17.63    |       |
|                  | SentiWordNet      | 65.08    | 59.13            | 73.17  | 65.41 | 72.59            | 58.42  | 64.74 | 65.07   | 46.60    |       |
|                  | SO-CAL            | 72.52    | 66.14            | 75.74  | 70.61 | 78.88            | 70.03  | 74.19 | 72.00   | 69.01    |       |
|                  | Stanford DM       | 63.85    | 75.77            | 26.03  | 38.75 | 61.73            | 93.48  | 74.36 | 56.56   | 82.39    |       |
|                  | Umigon            | 70.03    | 69.56            | 55.97  | 62.03 | 70.29            | 80.96  | 75.25 | 68.64   | 29.82    |       |
|                  | VADER             | 71.93    | 64.33            | 80.59  | 71.55 | 81.17            | 65.18  | 72.30 | 71.92   | 65.18    |       |
|                  | Comments<br>_TED  | AFINN    | 75.28            | 68.85  | 87.70 | 77.14            | 85.17  | 64.03 | 73.10   | 75.12    | 72.90 |
|                  |                   | ANEW_SUB | 54.91            | 49.74  | 91.26 | 64.38            | 78.40  | 25.59 | 38.58   | 51.48    | 95.19 |
|                  |                   | Emolex   | 67.27            | 59.88  | 85.46 | 70.42            | 81.03  | 52.03 | 63.37   | 66.89    | 68.50 |
| Emoticons        |                   | 91.67    | 100.00           | 75.00  | 85.71 | 88.89            | 100.00 | 94.12 | 89.92   | 1.65     |       |
| Emoticons DS     |                   | 43.74    | 43.74            | 100.00 | 60.86 | 0.00             | 0.00   | 0.00  | 30.43   | 100.00   |       |
| NRC Hashtag      |                   | 71.00    | 68.05            | 58.36  | 62.84 | 72.66            | 80.15  | 76.23 | 69.53   | 92.02    |       |
| LIWC07           |                   | 52.96    | 47.67            | 65.78  | 55.28 | 61.21            | 42.80  | 50.37 | 52.83   | 58.18    |       |
| LIWC15           |                   | 75.51    | 72.14            | 86.70  | 78.75 | 81.21            | 63.21  | 71.09 | 74.92   | 61.21    |       |
| Opinion Finder   |                   | 70.99    | 66.48            | 66.12  | 66.30 | 74.38            | 74.69  | 74.53 | 70.42   | 58.32    |       |
| Opinion Lexicon  |                   | 74.35    | 68.15            | 84.58  | 75.49 | 82.89            | 65.40  | 73.11 | 74.30   | 74.55    |       |
| PANAS-t          |                   | 82.35    | 100.00           | 75.00  | 85.71 | 62.50            | 100.00 | 76.92 | 81.32   | 2.34     |       |
| Pattern.en       |                   | 66.23    | 62.89            | 90.61  | 74.25 | 77.67            | 37.91  | 50.96 | 62.60   | 62.72    |       |
| SANN             |                   | 72.55    | 67.82            | 76.96  | 72.10 | 77.73            | 68.77  | 72.98 | 72.54   | 68.64    |       |
| SASA             |                   | 65.94    | 59.63            | 77.40  | 67.36 | 75.00            | 56.40  | 64.38 | 65.87   | 63.00    |       |
| Semantria        |                   | 75.21    | 73.09            | 82.38  | 77.46 | 78.17            | 67.54  | 72.47 | 74.96   | 64.92    |       |
| SenticNet        |                   | 70.81    | 63.05            | 78.71  | 70.01 | 79.94            | 64.78  | 71.56 | 70.79   | 98.49    |       |
| Sentiment140     |                   | 79.62    | 77.22            | 81.33  | 79.22 | 82.05            | 78.05  | 80.00 | 79.61   | 21.60    |       |
| Sentiment140.L   |                   | 61.45    | 54.48            | 75.00  | 63.11 | 72.14            | 50.81  | 59.62 | 61.37   | 91.33    |       |
| SentiStrength    |                   | 82.81    | 83.59            | 86.29  | 84.92 | 81.72            | 78.35  | 80.00 | 82.46   | 30.40    |       |
| SentiWordNet     |                   | 58.67    | 56.70            | 77.46  | 65.48 | 63.08            | 39.42  | 48.52 | 57.00   | 57.91    |       |
| SO-CAL           |                   | 73.87    | 73.36            | 77.97  | 75.59 | 74.49            | 69.43  | 71.88 | 73.73   | 75.79    |       |
| Stanford DM      |                   | 75.34    | 83.42            | 58.33  | 68.66 | 71.46            | 90.00  | 79.67 | 74.16   | 81.98    |       |
| Umigon           |                   | 70.86    | 74.09            | 75.81  | 74.94 | 66.23            | 64.15  | 65.18 | 70.06   | 51.44    |       |
| VADER            |                   | 73.97    | 67.14            | 84.95  | 75.00 | 83.46            | 64.63  | 72.85 | 73.93   | 83.49    |       |

Table 2: 2-classes experiments results with 4 datasets

| Dataset             | Method          | Accur. | Posit. Sentiment |       |       | Negat. Sentiment |        |       | MacroF1 | Coverage |
|---------------------|-----------------|--------|------------------|-------|-------|------------------|--------|-------|---------|----------|
|                     |                 |        | P                | R     | F1    | P                | R      | F1    |         |          |
| <b>Comments_YTB</b> | AFINN           | 85.92  | 86.93            | 94.08 | 90.36 | 82.72            | 66.73  | 73.87 | 82.12   | 74.18    |
|                     | ANEW.SUB        | 76.33  | 75.78            | 96.22 | 84.79 | 80.00            | 32.94  | 46.67 | 65.73   | 88.94    |
|                     | Emolex          | 79.31  | 82.46            | 87.58 | 84.94 | 71.70            | 62.82  | 66.97 | 75.95   | 58.63    |
|                     | Emoticons       | 88.44  | 91.50            | 95.31 | 93.37 | 64.00            | 48.48  | 55.17 | 74.27   | 9.25     |
|                     | Emoticons DS    | 68.86  | 68.91            | 99.63 | 81.47 | 62.50            | 1.34   | 2.62  | 42.05   | 97.99    |
|                     | NRC Hashtag     | 72.24  | 90.94            | 65.25 | 75.99 | 54.76            | 86.62  | 67.10 | 71.54   | 89.31    |
|                     | LIWC07          | 64.86  | 72.42            | 80.68 | 76.33 | 37.69            | 27.55  | 31.83 | 54.08   | 63.65    |
|                     | LIWC15          | 88.70  | 89.30            | 96.21 | 92.62 | 86.39            | 67.61  | 75.85 | 84.24   | 72.04    |
|                     | Opinion Finder  | 73.64  | 84.12            | 74.60 | 79.08 | 58.43            | 71.72  | 64.40 | 71.74   | 42.43    |
|                     | Opinion Lexicon | 84.89  | 87.88            | 91.06 | 89.44 | 76.84            | 70.26  | 73.40 | 81.42   | 68.01    |
|                     | PANAS-t         | 65.45  | 60.00            | 62.50 | 61.22 | 70.00            | 67.74  | 68.85 | 65.04   | 2.26     |
|                     | Pattern.en      | 87.24  | 87.87            | 96.68 | 92.06 | 83.85            | 56.33  | 67.39 | 79.73   | 67.97    |
|                     | SANN            | 81.05  | 84.28            | 90.14 | 87.11 | 70.82            | 58.71  | 64.20 | 75.65   | 44.04    |
|                     | SASA            | 69.17  | 84.55            | 67.96 | 75.36 | 49.81            | 71.91  | 58.85 | 67.10   | 71.63    |
|                     | Semantria       | 88.24  | 92.75            | 90.80 | 91.76 | 77.36            | 81.59  | 79.42 | 85.59   | 59.42    |
|                     | SenticNet       | 76.01  | 85.17            | 78.78 | 81.85 | 60.05            | 69.92  | 64.61 | 73.23   | 98.19    |
|                     | Sentiment140    | 87.41  | 91.56            | 91.15 | 91.35 | 76.38            | 77.29  | 76.83 | 84.09   | 38.20    |
|                     | Sentiment140.L  | 75.50  | 82.66            | 81.12 | 81.89 | 60.97            | 63.41  | 62.17 | 72.03   | 90.30    |
|                     | SentiStrength   | 95.27  | 97.48            | 96.40 | 96.94 | 87.96            | 91.35  | 89.62 | 93.28   | 38.24    |
|                     | SentiWordNet    | 75.26  | 83.05            | 82.00 | 82.52 | 56.81            | 58.60  | 57.69 | 70.10   | 59.00    |
|                     | SO-CAL          | 85.98  | 90.64            | 89.08 | 89.85 | 75.86            | 78.85  | 77.33 | 83.59   | 68.63    |
|                     | Stanford DM     | 69.04  | 93.56            | 58.90 | 72.29 | 50.41            | 91.15  | 64.92 | 68.60   | 79.81    |
| Umigon              | 82.01           | 94.53  | 80.39            | 86.89 | 60.65 | 86.67            | 71.36  | 79.13 | 71.55   |          |
| VADER               | 85.82           | 86.86  | 93.98            | 90.28 | 82.56 | 66.72            | 73.80  | 82.04 | 80.92   |          |
| <b>Reviews_I</b>    | AFINN           | 65.93  | 63.56            | 79.10 | 70.48 | 70.15            | 51.99  | 59.72 | 65.10   | 72.59    |
|                     | ANEW.SUB        | 56.80  | 54.23            | 92.30 | 68.32 | 72.46            | 20.64  | 32.13 | 50.23   | 96.30    |
|                     | Emolex          | 64.77  | 62.37            | 79.35 | 69.85 | 69.30            | 49.34  | 57.64 | 63.74   | 74.39    |
|                     | Emoticons       | 60.00  | 0.00             | 0.00  | 0.00  | 60.00            | 100.00 | 75.00 | 37.50   | 0.05     |
|                     | Emoticons DS    | 50.27  | 50.17            | 99.94 | 66.80 | 89.29            | 0.47   | 0.94  | 33.87   | 99.79    |
|                     | NRC Hashtag     | 62.34  | 62.14            | 64.45 | 63.27 | 62.57            | 60.20  | 61.36 | 62.32   | 93.47    |
|                     | LIWC07          | 63.00  | 61.37            | 82.45 | 70.36 | 67.08            | 40.81  | 50.75 | 60.56   | 66.08    |
|                     | LIWC15          | 63.35  | 61.77            | 82.30 | 70.57 | 67.24            | 41.64  | 51.43 | 61.00   | 66.08    |
|                     | Opinion Finder  | 26.55  | 100.00           | 26.55 | 41.96 | 0.00             | 0.00   | 0.00  | 20.98   | 49.12    |
|                     | Opinion Lexicon | 69.77  | 69.26            | 74.09 | 71.59 | 70.39            | 65.20  | 67.70 | 69.64   | 77.28    |
|                     | PANAS-t         | 66.30  | 75.44            | 61.72 | 67.89 | 58.12            | 72.55  | 64.53 | 66.21   | 3.40     |
|                     | Pattern.en      | 67.84  | 65.15            | 87.88 | 74.83 | 75.24            | 43.93  | 55.47 | 65.15   | 65.59    |
|                     | SANN            | 61.81  | 61.41            | 70.47 | 65.63 | 62.39            | 52.52  | 57.03 | 61.33   | 61.76    |
|                     | SASA            | 57.41  | 55.81            | 61.54 | 58.54 | 59.27            | 53.46  | 56.22 | 57.38   | 58.24    |
|                     | Semantria       | 69.64  | 70.68            | 68.58 | 69.61 | 68.63            | 70.73  | 69.66 | 69.64   | 68.80    |
|                     | SenticNet       | 96.30  | 98.15            | 96.63 | 97.39 | 91.92            | 95.47  | 93.66 | 95.52   | 69.41    |
|                     | Sentiment140    | 73.08  | 70.04            | 75.11 | 72.48 | 76.20            | 71.27  | 73.65 | 73.07   | 18.67    |
|                     | Sentiment140.L  | 63.18  | 60.01            | 83.00 | 69.66 | 70.73            | 42.61  | 53.18 | 61.42   | 93.51    |
|                     | SentiStrength   | 67.54  | 72.40            | 65.28 | 68.66 | 62.84            | 70.23  | 66.33 | 67.49   | 26.98    |
|                     | SentiWordNet    | 61.45  | 61.12            | 71.36 | 65.84 | 61.97            | 50.69  | 55.77 | 60.80   | 62.53    |
|                     | SO-CAL          | 71.65  | 72.09            | 72.82 | 72.46 | 71.18            | 70.43  | 70.80 | 71.63   | 89.10    |
|                     | Stanford DM     | 82.70  | 88.31            | 75.48 | 81.40 | 78.48            | 89.95  | 83.83 | 82.61   | 91.92    |
| Umigon              | 63.44           | 66.36  | 55.62            | 60.52 | 61.30 | 71.37            | 65.95  | 63.24 | 53.95   |          |
| VADER               | 65.19           | 62.75  | 80.36            | 70.47 | 69.98 | 48.97            | 57.62  | 64.04 | 82.70   |          |
| <b>Reviews_II</b>   | AFINN           | 65.95  | 63.40            | 78.99 | 70.34 | 70.44            | 52.33  | 60.05 | 65.19   | 73.93    |
|                     | ANEW.SUB        | 56.61  | 53.82            | 93.15 | 68.23 | 74.53            | 20.06  | 31.61 | 49.92   | 96.92    |
|                     | Emolex          | 64.96  | 62.04            | 80.00 | 69.88 | 70.52            | 49.41  | 58.11 | 64.00   | 75.15    |
|                     | Emoticons       | 0.00   | 0.00             | 0.00  | 0.00  | 0.00             | 0.00   | 0.00  | 0.00    | 0.00     |
|                     | Emoticons DS    | 49.86  | 49.77            | 99.92 | 66.45 | 85.19            | 0.43   | 0.86  | 33.65   | 99.80    |
|                     | NRC Hashtag     | 61.56  | 60.96            | 63.80 | 62.35 | 62.22            | 59.33  | 60.74 | 61.55   | 91.65    |
|                     | LIWC07          | 61.77  | 60.08            | 81.98 | 69.34 | 66.11            | 39.22  | 49.24 | 59.29   | 66.61    |
|                     | LIWC15          | 64.37  | 62.52            | 83.25 | 71.41 | 68.95            | 42.69  | 52.73 | 62.07   | 66.18    |
|                     | Opinion Finder  | 60.50  | 69.14            | 34.56 | 46.08 | 57.70            | 85.27  | 68.83 | 57.46   | 62.66    |
|                     | Opinion Lexicon | 70.11  | 69.28            | 74.97 | 72.01 | 71.15            | 65.00  | 67.93 | 69.97   | 77.98    |
|                     | PANAS-t         | 66.85  | 74.16            | 63.16 | 68.22 | 60.10            | 71.60  | 65.35 | 66.78   | 3.51     |
|                     | Pattern.en      | 68.24  | 65.09            | 88.82 | 75.13 | 77.06            | 44.08  | 56.08 | 65.60   | 65.99    |
|                     | SANN            | 62.29  | 61.73            | 71.33 | 66.19 | 63.11            | 52.59  | 57.37 | 61.78   | 64.81    |
|                     | SASA            | 57.40  | 56.00            | 61.91 | 58.81 | 59.07            | 53.06  | 55.90 | 57.35   | 58.98    |
|                     | Semantria       | 70.30  | 70.96            | 69.99 | 70.47 | 69.63            | 70.61  | 70.12 | 70.30   | 69.86    |
|                     | SenticNet       | 94.02  | 93.27            | 95.05 | 94.15 | 94.81            | 92.96  | 93.87 | 94.01   | 94.25    |
|                     | Sentiment140    | 74.83  | 72.67            | 76.34 | 74.46 | 77.04            | 73.44  | 75.20 | 74.83   | 19.89    |
|                     | Sentiment140.L  | 63.40  | 60.48            | 79.70 | 68.77 | 69.24            | 46.74  | 55.80 | 62.29   | 91.45    |
|                     | SentiStrength   | 69.17  | 74.17            | 66.77 | 70.28 | 64.33            | 72.04  | 67.97 | 69.12   | 27.13    |
|                     | SentiWordNet    | 61.99  | 61.55            | 71.05 | 65.96 | 62.65            | 52.25  | 56.98 | 61.47   | 62.81    |
|                     | SO-CAL          | 72.18  | 72.42            | 73.69 | 73.05 | 71.92            | 70.61  | 71.26 | 72.15   | 88.99    |
|                     | Stanford DM     | 86.17  | 89.11            | 82.37 | 85.61 | 83.64            | 89.95  | 86.68 | 86.15   | 91.46    |
| Umigon              | 63.96           | 67.38  | 55.94            | 61.13 | 61.46 | 72.19            | 66.40  | 63.76 | 56.42   |          |
| VADER               | 65.63           | 62.76  | 81.10            | 70.76 | 71.27 | 49.35            | 58.32  | 64.54 | 84.14   |          |
| <b>Myspace</b>      | AFINN           | 87.18  | 94.67            | 90.06 | 92.31 | 54.70            | 70.33  | 61.54 | 76.92   | 74.82    |
|                     | ANEW.SUB        | 86.33  | 88.09            | 96.88 | 92.27 | 64.29            | 30.00  | 40.91 | 66.59   | 91.25    |
|                     | Emolex          | 83.62  | 93.30            | 87.05 | 90.07 | 45.79            | 63.64  | 53.26 | 71.67   | 62.95    |
|                     | Emoticons       | 90.59  | 97.30            | 92.31 | 94.74 | 45.45            | 71.43  | 55.56 | 75.15   | 10.19    |
|                     | Emoticons DS    | 83.94  | 84.24            | 99.57 | 91.27 | 0.00             | 0.00   | 0.00  | 45.63   | 99.28    |
|                     | NRC Hashtag     | 55.67  | 95.89            | 49.47 | 65.27 | 24.77            | 88.71  | 38.73 | 52.00   | 94.12    |
|                     | LIWC07          | 83.07  | 90.30            | 90.12 | 90.21 | 37.18            | 37.66  | 37.42 | 63.82   | 68.71    |
|                     | LIWC15          | 91.95  | 95.34            | 95.52 | 95.43 | 66.67            | 65.75  | 66.21 | 80.82   | 73.02    |
|                     | Opinion Finder  | 72.78  | 94.27            | 73.04 | 82.31 | 28.83            | 71.11  | 41.03 | 61.67   | 40.53    |
|                     | Opinion Lexicon | 84.54  | 94.17            | 87.19 | 90.55 | 49.11            | 69.62  | 57.59 | 74.07   | 62.83    |
|                     | PANAS-t         | 96.25  | 100.00           | 96.05 | 97.99 | 57.14            | 100.00 | 72.73 | 85.36   | 9.89     |
|                     | Pattern.en      | 89.91  | 93.41            | 95.26 | 94.32 | 59.32            | 50.72  | 54.69 | 74.51   | 68.94    |
|                     | SANN            | 81.27  | 91.87            | 85.33 | 88.48 | 43.10            | 59.52  | 50.00 | 69.24   | 32.01    |
|                     | SASA            | 61.69  | 92.09            | 57.82 | 71.04 | 30.04            | 78.49  | 43.45 | 57.24   | 59.47    |
|                     | Semantria       | 84.52  | 94.17            | 87.13 | 90.51 | 49.41            | 70.00  | 57.93 | 74.22   | 47.24    |
|                     | SenticNet       | 71.97  | 92.17            | 72.91 | 81.42 | 31.64            | 66.92  | 42.96 | 62.19   | 98.80    |
|                     | Sentiment140    | 91.63  | 97.11            | 93.43 | 95.24 | 57.38            | 76.09  | 65.42 | 80.33   | 53.00    |
|                     | Sentiment140.L  | 80.83  | 92.92            | 83.80 | 88.12 | 41.40            | 64.17  | 50.33 | 69.23   | 95.08    |
|                     | SentiStrength   | 97.72  | 100.00           | 97.50 | 98.73 | 79.31            | 100.00 | 88.46 | 93.60   | 31.53    |
|                     | SentiWordNet    | 77.72  | 92.31            | 81.15 | 86.37 | 30.30            | 54.79  | 39.02 | 62.70   | 67.27    |
|                     | SO-CAL          | 84.40  | 94.84            | 86.16 | 90.29 | 50.40            | 75.00  | 60.29 | 75.29   | 63.79    |
|                     | Stanford DM     | 43.04  | 96.08            | 33.73 | 49.94 | 20.78            | 92.66  | 33.95 | 41.94   | 82.73    |
| Umigon              | 76.71           | 96.72  | 75.78            | 84.98 | 34.00 | 82.93            | 48.23  | 66.60 | 75.18   |          |
| VADER               | 88.10           | 94.18  | 91.91            | 93.03 | 55.24 | 63.74            | 59.18  | 76.11 | 80.58   |          |

Table 3: 2-classes experiments results with 4 datasets

| Dataset       | Method          | Accur. | Posit. Sentiment |        |       | Negat. Sentiment |       |       | MacroF1 | Coverage |
|---------------|-----------------|--------|------------------|--------|-------|------------------|-------|-------|---------|----------|
|               |                 |        | P                | R      | F1    | P                | R     | F1    |         |          |
| Amazon        | AFINN           | 78.69  | 80.17            | 87.87  | 83.84 | 75.43            | 63.14 | 68.74 | 76.29   | 62.80    |
|               | ANEW_SUB        | 65.28  | 63.79            | 95.82  | 76.59 | 77.33            | 20.79 | 32.77 | 54.68   | 94.93    |
|               | Emolex          | 66.59  | 71.89            | 72.91  | 72.40 | 58.31            | 57.08 | 57.69 | 65.04   | 58.86    |
|               | Emoticons       | 50.00  | 0.00             | 0.00   | 0.00  | 100.00           | 50.00 | 66.67 | 33.33   | 0.06     |
|               | Emoticons DS    | 59.95  | 59.61            | 100.00 | 74.70 | 100.00           | 2.04  | 4.00  | 39.35   | 99.53    |
|               | NRC Hashtag     | 64.13  | 74.30            | 60.52  | 66.70 | 54.60            | 69.40 | 61.12 | 63.91   | 89.81    |
|               | LIWC07          | 60.97  | 64.39            | 81.77  | 72.05 | 48.75            | 27.72 | 35.34 | 53.69   | 55.57    |
|               | LIWC15          | 76.74  | 77.25            | 91.65  | 83.83 | 74.94            | 48.06 | 58.57 | 71.20   | 56.45    |
|               | Opinion Finder  | 68.07  | 78.34            | 68.95  | 73.35 | 54.97            | 66.53 | 60.20 | 66.77   | 37.40    |
|               | Opinion Lexicon | 80.82  | 82.25            | 88.48  | 85.25 | 77.85            | 67.96 | 72.57 | 78.91   | 67.15    |
|               | PANAS-t         | 74.07  | 87.18            | 79.07  | 82.93 | 40.00            | 54.55 | 46.15 | 64.54   | 1.50     |
|               | Pattern.en      | 75.71  | 76.73            | 91.86  | 83.62 | 71.43            | 42.20 | 53.06 | 68.34   | 59.53    |
|               | SANN            | 71.98  | 73.97            | 87.44  | 80.14 | 65.51            | 43.67 | 52.41 | 66.27   | 43.99    |
|               | SASA            | 62.18  | 66.94            | 73.56  | 70.10 | 52.84            | 44.91 | 48.55 | 59.32   | 66.43    |
|               | Semantria       | 81.59  | 82.95            | 89.45  | 86.08 | 78.64            | 67.86 | 72.85 | 79.46   | 59.45    |
|               | SenticNet       | 69.91  | 79.99            | 65.30  | 71.90 | 60.55            | 76.52 | 67.60 | 69.75   | 97.48    |
|               | Sentiment140    | 77.45  | 92.35            | 63.89  | 75.53 | 68.43            | 93.67 | 79.08 | 77.31   | 26.90    |
|               | Sentiment140.L  | 62.92  | 75.38            | 54.56  | 63.30 | 53.74            | 74.76 | 62.53 | 62.91   | 90.17    |
|               | SentiStrength   | 90.52  | 92.24            | 95.51  | 93.85 | 84.31            | 75.00 | 79.38 | 86.62   | 19.58    |
|               | SentiWordNet    | 72.89  | 77.52            | 82.35  | 79.86 | 62.42            | 55.11 | 58.54 | 69.20   | 53.85    |
|               | SO-CAL          | 78.23  | 81.45            | 84.66  | 83.02 | 72.18            | 67.36 | 69.69 | 76.35   | 71.52    |
| Stanford DM   | 68.53           | 89.26  | 54.54            | 67.71  | 56.38 | 89.96            | 69.31 | 68.51 | 80.28   |          |
| Umigon        | 72.26           | 85.42  | 68.89            | 76.27  | 57.90 | 78.44            | 66.62 | 71.45 | 51.33   |          |
| VADER         | 77.05           | 77.28  | 88.99            | 82.72  | 76.48 | 57.77            | 65.82 | 74.27 | 71.33   |          |
| Tweets_DBT    | AFINN           | 71.08  | 58.32            | 83.71  | 68.74 | 86.38            | 63.34 | 73.09 | 70.92   | 59.58    |
|               | ANEW_SUB        | 53.97  | 42.46            | 83.71  | 56.34 | 80.75            | 37.61 | 51.32 | 53.83   | 89.14    |
|               | Emolex          | 63.28  | 48.43            | 75.92  | 59.14 | 81.33            | 56.48 | 66.67 | 62.90   | 58.77    |
|               | Emoticons       | 73.91  | 66.67            | 90.91  | 76.92 | 87.50            | 58.33 | 70.00 | 73.46   | 1.16     |
|               | Emoticons DS    | 37.41  | 37.16            | 100.00 | 54.18 | 100.00           | 0.64  | 1.28  | 27.73   | 99.55    |
|               | NRC Hashtag     | 65.31  | 52.53            | 23.60  | 32.57 | 67.73            | 88.26 | 76.64 | 54.61   | 94.09    |
|               | LIWC07          | 64.64  | 56.44            | 96.19  | 71.14 | 92.42            | 38.50 | 54.35 | 62.75   | 61.45    |
|               | LIWC15          | 69.36  | 58.17            | 87.19  | 69.78 | 86.73            | 57.19 | 68.93 | 69.35   | 54.42    |
|               | Opinion Finder  | 72.93  | 56.72            | 63.68  | 60.00 | 81.97            | 77.26 | 79.55 | 69.77   | 33.60    |
|               | Opinion Lexicon | 73.98  | 62.13            | 82.05  | 70.71 | 86.09            | 68.97 | 76.59 | 73.65   | 58.06    |
|               | PANAS-t         | 79.59  | 43.75            | 87.50  | 58.33 | 96.97            | 78.05 | 86.49 | 72.41   | 2.48     |
|               | Pattern.en      | 64.07  | 53.61            | 91.69  | 67.66 | 88.60            | 44.88 | 59.58 | 63.62   | 45.98    |
|               | SANN            | 65.87  | 50.14            | 80.84  | 61.90 | 85.30            | 58.05 | 69.09 | 65.49   | 31.53    |
|               | SASA            | 63.17  | 50.93            | 73.15  | 60.06 | 77.74            | 57.08 | 65.83 | 62.94   | 59.68    |
|               | Semantria       | 75.94  | 65.46            | 80.16  | 72.07 | 85.38            | 73.27 | 78.86 | 75.46   | 49.97    |
|               | SenticNet       | 64.96  | 52.19            | 54.67  | 53.40 | 72.95            | 70.93 | 71.93 | 62.66   | 78.02    |
|               | Sentiment140    | 79.51  | 63.75            | 85.00  | 72.86 | 91.47            | 76.89 | 83.55 | 78.20   | 18.75    |
|               | Sentiment140.L  | 64.83  | 51.49            | 74.96  | 61.05 | 80.19            | 58.94 | 67.94 | 64.49   | 91.66    |
|               | SentiStrength   | 77.88  | 62.76            | 69.47  | 65.94 | 85.71            | 81.63 | 83.62 | 74.78   | 21.48    |
|               | SentiWordNet    | 61.98  | 46.83            | 72.84  | 57.01 | 79.64            | 56.24 | 65.93 | 61.47   | 48.91    |
|               | SO-CAL          | 72.96  | 61.36            | 75.70  | 67.78 | 82.98            | 71.31 | 76.70 | 72.24   | 57.55    |
| Stanford DM   | 71.31           | 75.89  | 28.52            | 41.46  | 70.60 | 94.99            | 81.00 | 61.23 | 84.54   |          |
| Umigon        | 76.62           | 66.45  | 73.50            | 69.80  | 83.59 | 78.44            | 80.93 | 75.37 | 38.91   |          |
| VADER         | 69.43           | 55.60  | 84.89            | 67.19  | 87.25 | 60.39            | 71.38 | 69.29 | 68.92   |          |
| Tweets_RND_I  | AFINN           | 80.32  | 79.38            | 90.84  | 84.72 | 82.39            | 64.47 | 72.34 | 78.53   | 71.47    |
|               | ANEW_SUB        | 67.66  | 65.46            | 95.81  | 77.78 | 81.69            | 27.02 | 40.61 | 59.19   | 95.24    |
|               | Emolex          | 73.28  | 74.49            | 83.19  | 78.60 | 70.93            | 59.03 | 64.43 | 71.52   | 59.02    |
|               | Emoticons       | 85.43  | 90.27            | 90.27  | 90.27 | 71.05            | 71.05 | 71.05 | 80.66   | 13.19    |
|               | Emoticons DS    | 58.95  | 58.84            | 99.63  | 73.99 | 72.22            | 1.37  | 2.70  | 38.34   | 99.83    |
|               | NRC Hashtag     | 65.61  | 72.95            | 65.91  | 69.26 | 57.31            | 65.19 | 61.00 | 65.13   | 95.54    |
|               | LIWC07          | 59.92  | 62.41            | 79.37  | 69.87 | 52.66            | 32.43 | 40.14 | 55.01   | 54.61    |
|               | LIWC15          | 84.83  | 84.00            | 94.47  | 88.93 | 87.03            | 67.34 | 75.93 | 82.43   | 67.41    |
|               | Opinion Finder  | 77.16  | 82.14            | 78.04  | 80.04 | 70.90            | 75.92 | 73.32 | 76.68   | 40.37    |
|               | Opinion Lexicon | 81.56  | 82.00            | 87.68  | 84.74 | 80.84            | 72.98 | 76.71 | 80.73   | 63.74    |
|               | PANAS-t         | 85.45  | 91.18            | 86.11  | 88.57 | 76.19            | 84.21 | 80.00 | 84.29   | 4.81     |
|               | Pattern.en      | 81.44  | 79.86            | 94.98  | 86.77 | 86.50            | 57.30 | 68.94 | 77.85   | 66.62    |
|               | SANN            | 76.00  | 74.82            | 87.32  | 80.59 | 78.34            | 60.96 | 68.56 | 74.57   | 36.22    |
|               | SASA            | 65.60  | 70.72            | 70.36  | 70.54 | 58.47            | 58.89 | 58.68 | 64.61   | 58.67    |
|               | Semantria       | 83.98  | 85.94            | 87.75  | 86.83 | 80.85            | 78.28 | 79.54 | 83.19   | 58.63    |
|               | SenticNet       | 70.90  | 75.79            | 70.92  | 73.28 | 65.45            | 70.87 | 68.05 | 70.66   | 78.51    |
|               | Sentiment140    | 88.52  | 88.83            | 94.02  | 91.35 | 87.85            | 78.52 | 82.92 | 87.14   | 49.85    |
|               | Sentiment140.L  | 75.91  | 79.00            | 80.47  | 79.72 | 71.30            | 69.40 | 70.34 | 75.03   | 95.76    |
|               | SentiStrength   | 93.72  | 94.26            | 96.33  | 95.28 | 92.61            | 88.68 | 90.60 | 92.94   | 27.13    |
|               | SentiWordNet    | 70.70  | 76.03            | 77.64  | 76.83 | 61.27            | 59.11 | 60.17 | 68.50   | 62.78    |
|               | SO-CAL          | 80.85  | 82.08            | 85.98  | 83.98 | 78.92            | 73.66 | 76.20 | 80.09   | 64.57    |
| Stanford DM   | 54.19           | 87.02  | 25.40            | 39.33  | 47.44 | 94.67            | 63.21 | 51.27 | 92.70   |          |
| Umigon        | 82.07           | 89.22  | 80.71            | 84.76  | 73.02 | 84.26            | 78.24 | 81.50 | 67.50   |          |
| VADER         | 80.29           | 78.90  | 91.90            | 84.91  | 83.58 | 62.65            | 71.62 | 78.26 | 80.47   |          |
| Tweets_RND_II | AFINN           | 96.37  | 97.66            | 96.94  | 97.30 | 93.75            | 95.19 | 94.47 | 95.88   | 80.77    |
|               | ANEW_SUB        | 81.36  | 80.52            | 96.38  | 87.74 | 85.44            | 47.64 | 61.17 | 74.45   | 93.35    |
|               | Emolex          | 86.06  | 89.82            | 89.11  | 89.47 | 78.77            | 80.00 | 79.38 | 84.42   | 63.58    |
|               | Emoticons       | 97.75  | 97.90            | 99.42  | 98.65 | 96.97            | 89.72 | 93.20 | 95.93   | 14.82    |
|               | Emoticons DS    | 71.04  | 70.61            | 99.90  | 82.74 | 95.83            | 5.43  | 10.28 | 46.51   | 99.09    |
|               | NRC Hashtag     | 67.37  | 83.76            | 65.43  | 73.47 | 48.17            | 71.69 | 57.62 | 65.55   | 91.94    |
|               | LIWC07          | 66.47  | 74.46            | 78.81  | 76.58 | 44.20            | 38.31 | 41.04 | 58.81   | 73.93    |
|               | LIWC15          | 96.44  | 97.09            | 98.04  | 97.56 | 94.68            | 92.23 | 93.44 | 95.50   | 77.05    |
|               | Opinion Finder  | 78.32  | 93.86            | 71.11  | 80.92 | 63.42            | 91.50 | 74.92 | 77.92   | 41.23    |
|               | Opinion Lexicon | 93.45  | 97.03            | 93.14  | 95.04 | 86.93            | 94.11 | 90.38 | 92.71   | 70.64    |
|               | PANAS-t         | 90.71  | 96.95            | 88.19  | 92.36 | 82.11            | 95.12 | 88.14 | 90.25   | 5.39     |
|               | Pattern.en      | 91.76  | 92.94            | 96.19  | 94.54 | 87.86            | 79.06 | 83.23 | 88.88   | 70.85    |
|               | SANN            | 84.46  | 89.28            | 87.67  | 88.47 | 74.77            | 77.63 | 76.17 | 82.32   | 38.94    |
|               | SASA            | 70.06  | 82.81            | 72.81  | 77.49 | 49.05            | 63.39 | 55.30 | 66.40   | 63.04    |
|               | Semantria       | 91.61  | 96.94            | 90.55  | 93.64 | 82.25            | 93.88 | 87.68 | 90.66   | 63.61    |
|               | SenticNet       | 73.64  | 90.74            | 68.45  | 78.03 | 55.41            | 84.88 | 67.05 | 72.54   | 82.82    |
|               | Sentiment140    | 94.75  | 97.10            | 95.71  | 96.40 | 88.64            | 92.13 | 90.35 | 93.37   | 49.95    |
|               | Sentiment140.L  | 78.05  | 88.68            | 78.31  | 83.17 | 61.32            | 77.47 | 68.45 | 75.81   | 93.28    |
|               | SentiStrength   | 96.97  | 98.92            | 96.43  | 97.66 | 93.54            | 98.01 | 95.72 | 96.69   | 34.65    |
|               | SentiWordNet    | 78.57  | 87.88            | 80.91  | 84.25 | 61.09            | 72.87 | 66.46 | 75.36   | 61.49    |
|               | SO-CAL          | 87.76  | 94.25            | 86.99  | 90.47 | 77.34            | 89.32 | 82.90 | 86.68   | 67.18    |
| Stanford DM   | 60.46           | 94.48  | 44.87            | 60.84  | 44.06 | 94.30            | 60.06 | 60.45 | 88.89   |          |
| Umigon        | 88.63           | 97.73  | 85.92            | 91.45  | 73.64 | 95.17            | 83.03 | 87.24 | 70.83   |          |
| VADER         | 99.04           | 99.16  | 99.45            | 99.31  | 98.77 | 98.12            | 98.45 | 98.88 | 94.40   |          |

Table 4: 2-classes experiments results with 4 datasets

| Dataset            | Method          | Accur. | Posit. Sentiment |        |       | Negat. Sentiment |       |       | MacroF1 | Coverage |
|--------------------|-----------------|--------|------------------|--------|-------|------------------|-------|-------|---------|----------|
|                    |                 |        | P                | R      | F1    | P                | R     | F1    |         |          |
| Tweets<br>_RND_III | AFINN           | 86.66  | 87.38            | 91.11  | 89.21 | 85.43            | 79.84 | 82.54 | 85.87   | 78.81    |
|                    | ANEW.SUB        | 73.38  | 70.53            | 96.74  | 81.58 | 87.89            | 36.95 | 52.02 | 66.80   | 94.30    |
|                    | Emolex          | 82.02  | 83.90            | 87.55  | 85.69 | 78.64            | 73.19 | 75.82 | 80.75   | 67.07    |
|                    | Emoticons       | 92.74  | 94.66            | 95.38  | 95.02 | 87.50            | 85.71 | 86.60 | 90.81   | 14.59    |
|                    | Emoticons DS    | 61.98  | 61.51            | 99.73  | 76.09 | 90.00            | 3.77  | 7.23  | 41.66   | 99.02    |
|                    | NRC Hashtag     | 79.28  | 84.99            | 80.22  | 82.54 | 71.52            | 77.80 | 74.53 | 78.53   | 95.19    |
|                    | LIWC07          | 60.65  | 63.82            | 77.81  | 70.12 | 52.35            | 35.60 | 42.38 | 56.25   | 50.12    |
|                    | LIWC15          | 92.17  | 91.76            | 96.50  | 94.07 | 93.02            | 84.34 | 88.47 | 91.27   | 75.96    |
|                    | Opinion Finder  | 81.71  | 88.64            | 79.87  | 84.03 | 73.48            | 84.50 | 78.60 | 81.32   | 40.99    |
|                    | Opinion Lexicon | 88.21  | 88.43            | 92.79  | 90.56 | 87.82            | 81.07 | 84.31 | 87.43   | 70.50    |
|                    | PANAS-t         | 94.05  | 95.38            | 96.88  | 96.12 | 89.47            | 85.00 | 87.18 | 91.65   | 6.85     |
|                    | Pattern.en      | 87.58  | 87.00            | 95.47  | 91.04 | 89.11            | 72.22 | 79.78 | 85.41   | 73.51    |
|                    | SANN            | 79.69  | 79.53            | 88.60  | 83.82 | 80.00            | 66.67 | 72.73 | 78.27   | 42.14    |
|                    | SASA            | 76.94  | 80.44            | 81.41  | 80.92 | 71.52            | 70.21 | 70.86 | 75.89   | 67.16    |
|                    | Semantria       | 90.49  | 92.90            | 91.81  | 92.35 | 86.58            | 88.27 | 87.42 | 89.89   | 66.83    |
|                    | SenticNet       | 77.99  | 84.95            | 77.56  | 81.09 | 69.29            | 78.65 | 73.67 | 77.38   | 95.52    |
|                    | Sentiment140    | 96.95  | 98.96            | 96.22  | 97.57 | 93.67            | 98.23 | 95.90 | 96.73   | 50.77    |
|                    | Sentiment140.L  | 81.68  | 87.83            | 80.85  | 84.19 | 73.99            | 82.94 | 78.21 | 81.20   | 95.19    |
|                    | SentiStrength   | 94.99  | 96.27            | 96.57  | 96.42 | 91.97            | 91.30 | 91.64 | 94.03   | 37.41    |
|                    | SentiWordNet    | 72.54  | 79.19            | 78.75  | 78.97 | 60.14            | 60.76 | 60.45 | 69.71   | 67.97    |
|                    | SO-CAL          | 88.27  | 90.73            | 90.25  | 90.49 | 84.33            | 85.06 | 84.69 | 87.59   | 74.33    |
| Stanford DM        | 65.73           | 94.06  | 45.09            | 60.96  | 54.46 | 95.84            | 69.46 | 65.21 | 86.80   |          |
| Umigon             | 86.86           | 92.84  | 85.36            | 88.95  | 78.96 | 89.30            | 83.81 | 86.38 | 80.03   |          |
| VADER              | 87.08           | 87.01  | 92.77            | 89.80  | 87.19 | 78.05            | 82.37 | 86.08 | 86.39   |          |
| Tweets<br>_RND_IV  | AFINN           | 76.77  | 76.15            | 86.84  | 81.15 | 77.94            | 63.10 | 69.74 | 75.44   | 71.22    |
|                    | ANEW.SUB        | 65.28  | 63.80            | 92.16  | 75.40 | 72.73            | 28.57 | 41.03 | 58.21   | 95.32    |
|                    | Emolex          | 72.56  | 75.93            | 81.19  | 78.47 | 66.07            | 58.73 | 62.18 | 70.33   | 58.99    |
|                    | Emoticons       | 94.52  | 98.18            | 91.53  | 94.74 | 90.83            | 98.02 | 94.29 | 94.51   | 78.78    |
|                    | Emoticons DS    | 57.82  | 57.72            | 99.37  | 73.02 | 66.67            | 1.71  | 3.33  | 38.18   | 98.92    |
|                    | NRC Hashtag     | 61.83  | 67.36            | 64.67  | 65.99 | 55.08            | 58.04 | 56.52 | 61.25   | 94.24    |
|                    | LIWC07          | 67.97  | 70.30            | 78.89  | 74.35 | 63.46            | 52.38 | 57.39 | 65.87   | 55.04    |
|                    | LIWC15          | 93.97  | 92.36            | 97.79  | 95.00 | 96.59            | 88.54 | 92.39 | 93.70   | 83.45    |
|                    | Opinion Finder  | 70.34  | 75.00            | 73.91  | 74.45 | 64.00            | 65.31 | 64.65 | 69.55   | 42.45    |
|                    | Opinion Lexicon | 79.35  | 79.17            | 87.96  | 83.33 | 79.69            | 67.11 | 72.86 | 78.10   | 66.19    |
|                    | PANAS-t         | 56.52  | 63.64            | 53.85  | 58.33 | 50.00            | 60.00 | 54.55 | 56.44   | 8.27     |
|                    | Pattern.en      | 93.23  | 92.76            | 95.92  | 94.31 | 93.94            | 89.42 | 91.63 | 92.97   | 90.29    |
|                    | SANN            | 71.88  | 70.77            | 85.19  | 77.31 | 74.19            | 54.76 | 63.01 | 70.16   | 34.53    |
|                    | SASA            | 64.16  | 67.96            | 70.71  | 69.31 | 58.57            | 55.41 | 56.94 | 63.13   | 62.23    |
|                    | Semantria       | 91.74  | 94.83            | 90.16  | 92.44 | 88.24            | 93.75 | 90.91 | 91.67   | 78.42    |
|                    | SenticNet       | 82.85  | 90.60            | 77.94  | 83.79 | 75.41            | 89.32 | 81.78 | 82.79   | 85.97    |
|                    | Sentiment140    | 88.89  | 91.40            | 89.47  | 90.43 | 85.51            | 88.06 | 86.76 | 88.60   | 58.27    |
|                    | Sentiment140.L  | 84.03  | 90.30            | 80.67  | 85.21 | 77.52            | 88.50 | 82.64 | 83.93   | 94.60    |
|                    | SentiStrength   | 89.77  | 92.06            | 93.55  | 92.80 | 84.00            | 80.77 | 82.35 | 87.58   | 31.65    |
|                    | SentiWordNet    | 66.67  | 72.73            | 74.23  | 73.47 | 56.14            | 54.24 | 55.17 | 64.32   | 56.12    |
|                    | SO-CAL          | 75.53  | 73.50            | 85.15  | 78.90 | 78.87            | 64.37 | 70.89 | 74.89   | 67.63    |
| Stanford DM        | 61.51           | 83.82  | 39.86            | 54.03  | 53.26 | 89.91            | 66.89 | 60.46 | 90.65   |          |
| Umigon             | 91.25           | 95.65  | 88.59            | 91.99  | 86.40 | 94.74            | 90.38 | 91.18 | 94.60   |          |
| VADER              | 84.98           | 82.63  | 93.88            | 87.90  | 89.53 | 72.64            | 80.21 | 84.05 | 91.01   |          |
| Tweets<br>_STF     | AFINN           | 84.42  | 80.62            | 91.49  | 85.71 | 89.66            | 77.04 | 82.87 | 84.29   | 76.88    |
|                    | ANEW.SUB        | 68.05  | 63.08            | 93.18  | 75.23 | 84.62            | 40.74 | 55.00 | 65.11   | 94.15    |
|                    | Emolex          | 79.65  | 76.09            | 88.98  | 82.03 | 85.23            | 69.44 | 76.53 | 79.28   | 62.95    |
|                    | Emoticons       | 85.42  | 80.65            | 96.15  | 87.72 | 94.12            | 72.73 | 82.05 | 84.89   | 13.37    |
|                    | Emoticons DS    | 51.96  | 51.41            | 100.00 | 67.91 | 100.00           | 2.27  | 4.44  | 36.18   | 99.72    |
|                    | NRC Hashtag     | 71.30  | 73.05            | 70.93  | 71.98 | 69.51            | 71.70 | 70.59 | 71.28   | 92.20    |
|                    | LIWC07          | 64.29  | 63.75            | 76.12  | 69.39 | 65.22            | 50.85 | 57.14 | 63.27   | 70.39    |
|                    | LIWC15          | 89.22  | 84.18            | 97.08  | 90.17 | 96.40            | 81.06 | 88.07 | 89.12   | 74.93    |
|                    | Opinion Finder  | 80.77  | 81.16            | 76.71  | 78.87 | 80.46            | 84.34 | 82.35 | 80.61   | 43.45    |
|                    | Opinion Lexicon | 86.10  | 83.67            | 91.11  | 87.23 | 89.29            | 80.65 | 84.75 | 85.99   | 72.14    |
|                    | PANAS-t         | 94.12  | 88.89            | 100.00 | 94.12 | 100.00           | 88.89 | 94.12 | 94.12   | 4.74     |
|                    | Pattern.en      | 79.55  | 74.86            | 94.48  | 83.54 | 90.12            | 61.34 | 73.00 | 78.27   | 73.54    |
|                    | SANN            | 73.21  | 69.35            | 82.69  | 75.44 | 78.82            | 63.81 | 70.53 | 72.98   | 58.22    |
|                    | SASA            | 68.52  | 65.65            | 78.90  | 71.67 | 72.94            | 57.94 | 64.58 | 68.12   | 60.17    |
|                    | Semantria       | 88.45  | 89.15            | 88.46  | 88.80 | 87.70            | 88.43 | 88.07 | 88.43   | 69.92    |
|                    | SenticNet       | 70.49  | 71.31            | 63.50  | 67.18 | 69.88            | 76.82 | 73.19 | 70.18   | 80.22    |
|                    | Sentiment140    | 93.29  | 91.36            | 94.87  | 93.08 | 95.18            | 91.86 | 93.49 | 93.29   | 45.68    |
|                    | Sentiment140.L  | 79.12  | 81.48            | 76.30  | 78.81 | 76.97            | 82.04 | 79.42 | 79.11   | 94.71    |
|                    | SentiStrength   | 95.33  | 95.18            | 96.34  | 95.76 | 95.52            | 94.12 | 94.81 | 95.29   | 41.78    |
|                    | SentiWordNet    | 72.99  | 73.17            | 78.95  | 75.95 | 72.73            | 65.98 | 69.19 | 72.57   | 58.77    |
|                    | SO-CAL          | 87.36  | 82.89            | 93.33  | 87.80 | 92.80            | 81.69 | 86.89 | 87.35   | 77.16    |
| Stanford DM        | 66.56           | 87.69  | 36.31            | 51.35  | 61.24 | 95.18            | 74.53 | 62.94 | 89.97   |          |
| Umigon             | 86.99           | 91.73  | 81.88            | 86.52  | 83.02 | 92.31            | 87.42 | 86.97 | 81.34   |          |
| VADER              | 84.44           | 80.23  | 92.21            | 85.80  | 90.40 | 76.35            | 82.78 | 84.29 | 84.12   |          |
| Tweets<br>_SAN     | AFINN           | 77.85  | 72.73            | 86.72  | 79.11 | 84.83            | 69.54 | 76.43 | 77.77   | 69.94    |
|                    | ANEW.SUB        | 59.82  | 54.08            | 95.69  | 69.11 | 88.02            | 28.05 | 42.55 | 55.83   | 90.56    |
|                    | Emolex          | 72.06  | 65.42            | 85.67  | 74.19 | 82.61            | 60.06 | 69.55 | 71.87   | 60.04    |
|                    | Emoticons       | 85.71  | 87.50            | 89.74  | 88.61 | 82.61            | 79.17 | 80.85 | 84.73   | 5.77     |
|                    | Emoticons DS    | 47.20  | 47.13            | 99.21  | 63.90 | 55.56            | 0.88  | 1.74  | 32.82   | 98.08    |
|                    | NRC Hashtag     | 69.77  | 72.01            | 58.71  | 64.69 | 68.36            | 79.63 | 73.57 | 69.13   | 93.68    |
|                    | LIWC07          | 77.27  | 71.37            | 92.05  | 80.40 | 88.38            | 62.10 | 72.95 | 76.67   | 63.70    |
|                    | LIWC15          | 79.18  | 73.82            | 91.98  | 81.90 | 88.64            | 65.73 | 75.48 | 78.69   | 66.91    |
|                    | Opinion Finder  | 68.60  | 63.54            | 71.35  | 67.22 | 73.80            | 66.35 | 69.87 | 68.55   | 34.74    |
|                    | Opinion Lexicon | 81.77  | 78.18            | 86.74  | 82.24 | 85.98            | 77.05 | 81.27 | 81.75   | 65.35    |
|                    | PANAS-t         | 84.62  | 80.00            | 80.00  | 80.00 | 87.50            | 87.50 | 87.50 | 83.75   | 2.38     |
|                    | Pattern.en      | 77.23  | 72.25            | 91.91  | 80.90 | 87.23            | 61.01 | 71.80 | 76.35   | 64.80    |
|                    | SANN            | 67.35  | 61.98            | 85.79  | 71.96 | 78.57            | 49.75 | 60.92 | 66.44   | 35.66    |
|                    | SASA            | 61.18  | 61.74            | 74.71  | 67.61 | 60.12            | 45.16 | 51.58 | 59.59   | 43.45    |
|                    | Semantria       | 78.91  | 76.42            | 82.85  | 79.50 | 81.79            | 75.08 | 78.29 | 78.90   | 57.38    |
|                    | SenticNet       | 66.51  | 65.31            | 57.73  | 61.29 | 67.33            | 73.96 | 70.49 | 65.89   | 77.45    |
|                    | Sentiment140    | 85.27  | 82.21            | 88.89  | 85.42 | 88.65            | 81.85 | 85.12 | 85.27   | 44.18    |
|                    | Sentiment140.L  | 72.26  | 71.06            | 69.01  | 70.02 | 73.26            | 75.14 | 74.19 | 72.10   | 94.50    |
|                    | SentiStrength   | 89.47  | 88.70            | 91.81  | 90.23 | 90.41            | 86.84 | 88.59 | 89.41   | 29.61    |
|                    | SentiWordNet    | 67.49  | 64.25            | 75.63  | 69.48 | 71.90            | 59.70 | 65.23 | 67.35   | 59.21    |
|                    | SO-CAL          | 79.70  | 74.74            | 84.55  | 79.34 | 85.11            | 75.56 | 80.05 | 79.70   | 68.19    |
| Stanford DM        | 62.72           | 87.60  | 22.60            | 35.93  | 59.35 | 97.25            | 73.71 | 54.82 | 92.94   |          |
| Umigon             | 82.41           | 83.66  | 80.49            | 82.04  | 81.25 | 84.32            | 82.76 | 82.40 | 67.74   |          |
| VADER              | 77.28           | 71.76  | 88.54            | 79.27  | 85.76 | 66.44            | 74.87 | 77.07 | 78.28   |          |

Table 5: 2-classes experiments results with 2 datasets

| Dataset                    | Method          | Accur. | Posit. Sentiment |        |       | Negat. Sentiment |       |       | MacroF1 | Coverage |
|----------------------------|-----------------|--------|------------------|--------|-------|------------------|-------|-------|---------|----------|
|                            |                 |        | P                | R      | F1    | P                | R     | F1    |         |          |
| <b>Tweets<br/>_Semeval</b> | AFINN           | 86.05  | 90.95            | 90.01  | 90.48 | 72.88            | 75.00 | 73.93 | 82.20   | 76.83    |
|                            | ANEW_SUB        | 77.63  | 77.91            | 97.01  | 86.42 | 74.62            | 24.22 | 36.57 | 61.49   | 98.30    |
|                            | Emolex          | 79.82  | 86.58            | 86.48  | 86.53 | 59.70            | 59.93 | 59.81 | 73.17   | 70.29    |
|                            | Emoticons       | 92.24  | 95.09            | 95.45  | 95.27 | 78.95            | 77.59 | 78.26 | 86.77   | 10.52    |
|                            | Emoticons DS    | 72.75  | 72.72            | 100.00 | 84.20 | 100.00           | 0.36  | 0.71  | 42.46   | 100.00   |
|                            | NRC Hashtag     | 72.15  | 83.82            | 76.83  | 80.17 | 48.25            | 59.29 | 53.20 | 66.69   | 96.80    |
|                            | LIWC07          | 64.54  | 74.33            | 78.88  | 76.54 | 30.19            | 25.12 | 27.42 | 51.98   | 53.17    |
|                            | LIWC15          | 87.40  | 90.23            | 93.60  | 91.88 | 76.77            | 67.61 | 71.90 | 81.89   | 72.39    |
|                            | Opinion Finder  | 75.95  | 90.13            | 74.02  | 81.28 | 56.40            | 80.57 | 66.35 | 73.82   | 38.86    |
|                            | Opinion Lexicon | 86.20  | 92.07            | 88.90  | 90.46 | 71.75            | 78.65 | 75.04 | 82.75   | 69.61    |
|                            | PANAS-t         | 91.76  | 96.63            | 93.49  | 95.04 | 70.21            | 82.50 | 75.86 | 85.45   | 8.33     |
|                            | Pattern.en      | 84.28  | 89.04            | 90.95  | 89.99 | 66.00            | 61.08 | 63.44 | 76.71   | 70.69    |
|                            | SANN            | 78.94  | 83.35            | 87.97  | 85.60 | 65.64            | 56.68 | 60.83 | 73.21   | 38.17    |
|                            | SASA            | 75.63  | 81.44            | 87.26  | 84.25 | 52.31            | 41.26 | 46.13 | 65.19   | 53.24    |
|                            | Semantria       | 85.25  | 94.17            | 85.40  | 89.57 | 66.97            | 84.84 | 74.85 | 82.21   | 65.82    |
|                            | SenticNet       | 75.00  | 82.35            | 77.78  | 80.00 | 63.64            | 70.00 | 66.67 | 73.33   | 1.83     |
|                            | Sentiment140    | 91.07  | 96.13            | 92.17  | 94.11 | 76.57            | 87.33 | 81.60 | 87.85   | 52.35    |
|                            | Sentiment140.L  | 74.59  | 86.83            | 76.86  | 81.54 | 52.24            | 68.46 | 59.26 | 70.40   | 96.73    |
|                            | SentiStrength   | 91.11  | 96.17            | 91.78  | 93.93 | 78.40            | 89.09 | 83.40 | 88.66   | 28.66    |
|                            | SentiWordNet    | 69.93  | 86.53            | 72.04  | 78.62 | 40.52            | 62.93 | 49.29 | 63.96   | 70.20    |
|                            | SO-CAL          | 82.52  | 90.17            | 85.03  | 87.53 | 66.28            | 76.05 | 70.83 | 79.18   | 69.93    |
|                            | Stanford DM     | 41.13  | 94.17            | 19.78  | 32.70 | 31.64            | 96.81 | 47.69 | 40.19   | 92.32    |
|                            | Umigon          | 81.44  | 94.98            | 79.34  | 86.46 | 59.02            | 87.64 | 70.54 | 78.50   | 68.86    |
|                            | VADER           | 86.11  | 89.78            | 91.51  | 90.64 | 75.19            | 71.18 | 73.13 | 81.88   | 85.42    |
| <b>RW</b>                  | AFINN           | 82.25  | 83.16            | 93.98  | 88.24 | 78.63            | 53.80 | 63.89 | 76.06   | 83.12    |
|                            | ANEW_SUB        | 71.51  | 71.47            | 97.88  | 82.62 | 72.22            | 12.38 | 21.14 | 51.88   | 96.60    |
|                            | Emolex          | 74.54  | 79.14            | 86.39  | 82.60 | 59.69            | 46.95 | 52.56 | 67.58   | 77.45    |
|                            | Emoticons       | 88.89  | 91.30            | 95.45  | 93.33 | 75.00            | 60.00 | 66.67 | 80.00   | 15.32    |
|                            | Emoticons DS    | 69.23  | 69.05            | 100.00 | 81.69 | 100.00           | 1.82  | 3.57  | 42.63   | 99.57    |
|                            | NRC Hashtag     | 65.06  | 81.10            | 63.52  | 71.24 | 46.71            | 68.35 | 55.49 | 63.37   | 97.02    |
|                            | LIWC07          | 83.18  | 83.12            | 96.77  | 89.43 | 83.54            | 45.52 | 58.93 | 74.18   | 77.59    |
|                            | LIWC15          | 83.87  | 83.89            | 96.86  | 89.91 | 83.75            | 46.53 | 59.82 | 74.87   | 79.15    |
|                            | Opinion Finder  | 61.30  | 79.91            | 58.81  | 67.75 | 42.04            | 66.90 | 51.63 | 59.69   | 65.25    |
|                            | Opinion Lexicon | 80.25  | 83.89            | 89.03  | 86.39 | 69.50            | 59.39 | 64.05 | 75.22   | 79.01    |
|                            | PANAS-t         | 63.64  | 80.00            | 64.52  | 71.43 | 42.11            | 61.54 | 50.00 | 60.71   | 12.48    |
|                            | Pattern.en      | 82.63  | 84.20            | 95.03  | 89.29 | 73.02            | 42.99 | 54.12 | 71.70   | 63.69    |
|                            | SANN            | 77.99  | 83.85            | 86.10  | 84.96 | 61.19            | 56.94 | 58.99 | 71.98   | 36.74    |
|                            | SASA            | 66.00  | 78.04            | 71.33  | 74.53 | 44.83            | 53.72 | 48.87 | 61.70   | 56.74    |
|                            | Semantria       | 84.16  | 90.46            | 87.03  | 88.71 | 70.29            | 76.98 | 73.48 | 81.10   | 62.70    |
|                            | SenticNet       | 66.98  | 86.36            | 61.43  | 71.79 | 48.62            | 79.00 | 60.19 | 65.99   | 89.79    |
|                            | Sentiment140    | 83.26  | 93.36            | 81.40  | 86.97 | 68.23            | 87.33 | 76.61 | 81.79   | 67.80    |
|                            | Sentiment140.L  | 69.85  | 88.22            | 65.18  | 74.97 | 50.60            | 80.38 | 62.11 | 68.54   | 96.45    |
|                            | SentiStrength   | 85.89  | 93.69            | 86.67  | 90.04 | 69.23            | 83.72 | 75.79 | 82.92   | 23.12    |
|                            | SentiWordNet    | 68.94  | 80.90            | 74.21  | 77.41 | 45.92            | 55.56 | 50.28 | 63.85   | 81.28    |
|                            | SO-CAL          | 76.03  | 86.12            | 78.15  | 81.94 | 58.74            | 71.18 | 64.36 | 73.15   | 79.29    |
|                            | Stanford DM     | 43.10  | 96.25            | 17.46  | 29.56 | 35.58            | 98.53 | 52.28 | 40.92   | 91.49    |
|                            | Umigon          | 60.32  | 91.43            | 48.12  | 63.05 | 42.02            | 89.29 | 57.14 | 60.10   | 80.43    |
|                            | VADER           | 81.75  | 81.85            | 95.28  | 88.06 | 81.25            | 49.19 | 61.28 | 74.67   | 89.36    |

Table 6: 3-classes experiments results with 4 datasets

| Dataset           | Method          | Accur. | Posit. Sentiment |        |       | Negat. Sentiment |       |       | Neut. Sentiment |        |       | MacroF1 |
|-------------------|-----------------|--------|------------------|--------|-------|------------------|-------|-------|-----------------|--------|-------|---------|
|                   |                 |        | P                | R      | F1    | P                | R     | F1    | P               | R      | F1    |         |
| Comments<br>_BBC  | AFINN           | 50.10  | 16.22            | 60.61  | 25.59 | 82.62            | 56.05 | 66.79 | 40.11           | 30.24  | 34.48 | 42.29   |
|                   | ANEW_SUB        | 24.30  | 11.38            | 91.92  | 20.24 | 84.15            | 21.13 | 33.78 | 38.89           | 5.65   | 9.86  | 21.30   |
|                   | Emolex          | 44.10  | 15.51            | 65.66  | 25.10 | 83.19            | 45.48 | 58.81 | 35.27           | 31.85  | 33.47 | 39.13   |
|                   | Emoticons       | 24.60  | 0.00             | 0.00   | 0.00  | 33.33            | 0.15  | 0.30  | 19.77           | 98.79  | 32.95 | 11.09   |
|                   | Emoticons DS    | 10.00  | 9.85             | 98.99  | 17.92 | 66.67            | 0.31  | 0.61  | 0.00            | 0.00   | 0.00  | 6.18    |
|                   | NRC Hashtag     | 64.00  | 20.72            | 23.23  | 21.90 | 70.20            | 91.27 | 79.36 | 52.50           | 8.47   | 14.58 | 38.62   |
|                   | LIWC07          | 33.00  | 11.11            | 42.42  | 17.61 | 67.69            | 33.69 | 44.99 | 22.90           | 27.42  | 24.95 | 29.18   |
|                   | LIWC15          | 43.70  | 17.94            | 68.69  | 28.45 | 85.06            | 42.73 | 56.88 | 30.72           | 36.29  | 33.27 | 39.53   |
|                   | Opinion Finder  | 51.80  | 14.96            | 35.35  | 21.02 | 78.76            | 60.18 | 68.23 | 33.71           | 36.29  | 34.95 | 41.40   |
|                   | Opinion Lexicon | 55.00  | 20.67            | 62.63  | 31.08 | 85.27            | 59.42 | 70.04 | 40.82           | 40.32  | 40.57 | 47.23   |
|                   | PANAS-t         | 27.10  | 16.67            | 6.06   | 8.89  | 75.61            | 4.75  | 8.93  | 25.35           | 94.35  | 39.97 | 19.26   |
|                   | Pattern.en      | 28.70  | 14.25            | 58.59  | 22.92 | 82.61            | 17.46 | 28.82 | 25.27           | 46.37  | 32.72 | 28.16   |
|                   | SANN            | 33.80  | 13.75            | 33.33  | 19.47 | 82.25            | 21.29 | 33.82 | 28.09           | 66.94  | 39.57 | 30.95   |
|                   | SASA            | 38.20  | 17.03            | 47.47  | 25.07 | 70.75            | 36.29 | 47.98 | 25.19           | 39.52  | 30.77 | 34.60   |
|                   | Semantria       | 56.00  | 28.90            | 50.51  | 36.76 | 83.82            | 57.12 | 67.94 | 35.86           | 55.24  | 43.49 | 49.40   |
|                   | SenticNet       | 47.10  | 17.74            | 66.67  | 28.03 | 72.87            | 57.58 | 64.33 | 25.89           | 11.69  | 16.11 | 36.16   |
|                   | Sentiment140    | 40.00  | 17.75            | 30.30  | 22.39 | 79.77            | 31.39 | 45.05 | 28.75           | 66.53  | 40.15 | 35.86   |
|                   | Sentiment140_L  | 43.10  | 13.32            | 65.66  | 22.15 | 73.84            | 53.60 | 62.11 | 42.11           | 6.45   | 11.19 | 31.82   |
|                   | SentiStrength   | 44.20  | 47.37            | 18.18  | 26.28 | 86.64            | 32.77 | 47.56 | 29.37           | 84.68  | 43.61 | 39.15   |
|                   | SentiWordNet    | 42.40  | 14.90            | 59.60  | 23.84 | 81.63            | 41.50 | 55.03 | 34.56           | 37.90  | 36.15 | 38.34   |
|                   | SO-CAL          | 55.50  | 20.88            | 57.58  | 30.65 | 80.47            | 63.09 | 70.73 | 28.57           | 34.68  | 31.33 | 44.23   |
| Stanford DM       | 65.50           | 43.37  | 36.36            | 39.56  | 71.01 | 89.28            | 79.10 | 37.50 | 14.52           | 20.93  | 46.53 |         |
| Umigon            | 45.70           | 28.35  | 36.36            | 31.86  | 76.35 | 41.04            | 53.39 | 29.31 | 61.69           | 39.74  | 41.66 |         |
| VADER             | 49.40           | 16.36  | 71.72            | 26.64  | 83.02 | 54.67            | 65.93 | 48.53 | 26.61           | 34.38  | 42.31 |         |
| Comments<br>_Digg | AFINN           | 52.09  | 33.78            | 60.00  | 43.22 | 80.06            | 50.52 | 61.95 | 42.57           | 49.49  | 45.77 | 50.31   |
|                   | ANEW_SUB        | 33.89  | 22.67            | 85.71  | 35.86 | 73.66            | 23.95 | 36.15 | 49.48           | 16.27  | 24.49 | 32.16   |
|                   | Emolex          | 43.64  | 25.00            | 43.33  | 31.71 | 75.16            | 40.73 | 52.83 | 36.23           | 49.49  | 41.83 | 42.13   |
|                   | Emoticons       | 28.69  | 61.90            | 6.19   | 11.26 | 60.00            | 1.05  | 2.06  | 21.71           | 98.31  | 35.56 | 16.29   |
|                   | Emoticons DS    | 20.98  | 19.92            | 99.05  | 33.17 | 66.67            | 1.75  | 3.41  | 44.44           | 2.71   | 5.11  | 13.90   |
|                   | NRC Hashtag     | 53.57  | 35.02            | 36.19  | 35.60 | 60.57            | 81.64 | 69.55 | 38.20           | 11.53  | 17.71 | 40.95   |
|                   | LIWC07          | 31.10  | 20.45            | 34.76  | 25.75 | 51.12            | 23.95 | 32.62 | 27.65           | 42.37  | 33.47 | 30.61   |
|                   | LIWC15          | 47.54  | 36.83            | 61.90  | 46.18 | 80.97            | 37.94 | 51.67 | 36.18           | 55.93  | 43.94 | 47.26   |
|                   | Opinion Finder  | 46.24  | 32.69            | 32.38  | 32.54 | 71.64            | 42.83 | 53.61 | 35.10           | 62.71  | 45.01 | 43.72   |
|                   | Opinion Lexicon | 49.77  | 34.67            | 57.62  | 43.29 | 78.43            | 47.03 | 58.80 | 37.92           | 49.49  | 42.94 | 48.34   |
|                   | PANAS-t         | 28.23  | 11.11            | 0.48   | 0.91  | 66.67            | 2.80  | 5.37  | 27.49           | 97.29  | 42.87 | 16.38   |
|                   | Pattern.en      | 41.60  | 33.59            | 61.43  | 43.43 | 79.65            | 23.95 | 36.83 | 34.93           | 61.69  | 44.61 | 41.62   |
|                   | SANN            | 37.05  | 28.52            | 35.71  | 31.71 | 69.64            | 20.45 | 31.62 | 32.04           | 70.17  | 44.00 | 35.78   |
|                   | SASA            | 43.36  | 29.81            | 44.29  | 35.63 | 64.25            | 44.93 | 52.88 | 32.05           | 39.66  | 35.45 | 41.32   |
|                   | Semantria       | 50.51  | 45.89            | 50.48  | 48.07 | 79.75            | 44.76 | 57.33 | 34.67           | 61.69  | 44.39 | 49.93   |
|                   | SenticNet       | 49.95  | 33.71            | 71.43  | 45.80 | 63.28            | 65.38 | 64.32 | 34.15           | 4.75   | 8.33  | 39.48   |
|                   | Sentiment140    | 41.50  | 46.39            | 21.43  | 29.32 | 75.64            | 30.94 | 43.92 | 30.16           | 76.27  | 43.23 | 38.82   |
|                   | Sentiment140_L  | 48.75  | 29.75            | 61.90  | 40.19 | 67.78            | 60.31 | 63.83 | 38.17           | 16.95  | 23.47 | 42.50   |
|                   | SentiStrength   | 42.53  | 64.00            | 22.86  | 33.68 | 85.71            | 26.22 | 40.16 | 31.44           | 88.14  | 46.35 | 40.06   |
|                   | SentiWordNet    | 42.15  | 27.53            | 41.43  | 33.08 | 73.43            | 34.79 | 47.21 | 34.29           | 56.95  | 42.80 | 41.03   |
|                   | SO-CAL          | 53.57  | 38.54            | 52.86  | 44.58 | 75.47            | 55.94 | 64.26 | 28.57           | 49.49  | 36.23 | 48.35   |
| Stanford DM       | 45.14           | 25.00  | 15.71            | 19.29  | 54.74 | 68.85            | 60.99 | 26.11 | 19.92           | 22.60  | 34.29 |         |
| Umigon            | 53.57           | 52.97  | 46.67            | 49.62  | 71.62 | 54.72            | 62.04 | 36.48 | 56.27           | 44.27  | 51.98 |         |
| VADER             | 53.30           | 32.96  | 69.52            | 44.72  | 81.64 | 52.10            | 63.61 | 48.33 | 44.07           | 46.10  | 51.47 |         |
| Comments<br>_NYT  | AFINN           | 42.45  | 64.81            | 41.79  | 50.81 | 80.29            | 39.82 | 53.24 | 7.89            | 77.87  | 14.32 | 39.46   |
|                   | ANEW_SUB        | 51.12  | 48.35            | 88.57  | 62.55 | 79.65            | 24.69 | 37.69 | 7.92            | 9.84   | 8.78  | 36.34   |
|                   | Emolex          | 42.97  | 55.12            | 53.72  | 54.41 | 75.35            | 33.33 | 46.22 | 7.22            | 54.10  | 12.74 | 37.79   |
|                   | Emoticons       | 4.68   | 0.00             | 0.00   | 0.00  | 0.00             | 0.00  | 0.00  | 4.47            | 99.59  | 8.56  | 2.85    |
|                   | Emoticons DS    | 42.58  | 42.55            | 99.77  | 59.66 | 78.57            | 0.40  | 0.80  | 0.00            | 0.00   | 0.00  | 20.15   |
|                   | NRC Hashtag     | 54.84  | 55.38            | 45.74  | 50.10 | 61.55            | 65.68 | 63.55 | 8.33            | 15.16  | 10.76 | 41.47   |
|                   | LIWC07          | 24.35  | 42.88            | 27.72  | 33.67 | 53.42            | 19.07 | 28.11 | 4.67            | 53.28  | 8.58  | 23.45   |
|                   | LIWC15          | 36.49  | 65.29            | 40.29  | 49.83 | 81.50            | 29.25 | 43.05 | 7.17            | 83.61  | 13.20 | 35.36   |
|                   | Opinion Finder  | 29.38  | 68.77            | 18.78  | 29.51 | 76.52            | 32.68 | 45.80 | 6.29            | 88.11  | 11.75 | 29.02   |
|                   | Opinion Lexicon | 44.57  | 65.95            | 43.15  | 52.17 | 79.81            | 43.11 | 55.98 | 7.94            | 73.77  | 14.34 | 40.83   |
|                   | PANAS-t         | 5.88   | 69.23            | 1.23   | 2.41  | 62.07            | 1.31  | 2.57  | 4.75            | 99.18  | 9.07  | 4.68    |
|                   | Pattern.en      | 31.60  | 55.23            | 45.05  | 49.63 | 72.80            | 17.76 | 28.55 | 5.88            | 65.57  | 10.79 | 29.66   |
|                   | SANN            | 27.44  | 56.61            | 28.95  | 38.31 | 77.69            | 21.59 | 33.79 | 5.88            | 79.51  | 10.94 | 27.68   |
|                   | SASA            | 30.04  | 49.92            | 30.13  | 37.58 | 59.11            | 27.21 | 37.26 | 5.74            | 61.07  | 10.49 | 28.44   |
|                   | Semantria       | 44.59  | 70.60            | 41.83  | 52.54 | 80.54            | 44.24 | 57.11 | 7.53            | 73.36  | 13.65 | 41.10   |
|                   | SenticNet       | 61.85  | 58.19            | 59.48  | 58.83 | 65.01            | 69.26 | 67.07 | 0.00            | 0.00   | 0.00  | 41.97   |
|                   | Sentiment140    | 13.58  | 77.32            | 6.81   | 12.51 | 75.40            | 11.96 | 20.65 | 4.98            | 93.03  | 9.45  | 14.20   |
|                   | Sentiment140_L  | 54.61  | 54.72            | 59.12  | 56.84 | 67.00            | 54.41 | 60.05 | 6.70            | 15.98  | 9.44  | 42.11   |
|                   | SentiStrength   | 18.17  | 78.51            | 8.62   | 15.54 | 81.12            | 18.96 | 30.74 | 5.41            | 95.49  | 10.24 | 18.84   |
|                   | SentiWordNet    | 32.20  | 57.35            | 34.53  | 43.10 | 70.31            | 26.95 | 38.97 | 6.08            | 70.08  | 11.19 | 31.09   |
|                   | SO-CAL          | 50.79  | 64.36            | 51.13  | 56.99 | 77.25            | 49.16 | 60.08 | 8.68            | 65.98  | 15.34 | 44.14   |
| Stanford DM       | 51.93           | 73.39  | 21.14            | 32.83  | 59.48 | 77.90            | 67.46 | 9.65  | 38.11           | 15.40  | 38.56 |         |
| Umigon            | 24.08           | 68.76  | 16.38            | 26.46  | 68.78 | 24.51            | 36.14 | 5.88  | 88.93           | 11.04  | 24.54 |         |
| VADER             | 48.03           | 62.67  | 51.63            | 56.62  | 79.91 | 43.07            | 55.97 | 9.18  | 71.31           | 16.26  | 42.95 |         |
| Comments<br>_TED  | AFINN           | 54.11  | 62.78            | 69.50  | 65.97 | 75.74            | 43.52 | 55.28 | 21.83           | 49.11  | 30.22 | 50.49   |
|                   | ANEW_SUB        | 46.25  | 42.79            | 88.68  | 57.73 | 71.53            | 23.96 | 35.90 | 18.60           | 7.14   | 10.32 | 34.65   |
|                   | Emolex          | 45.77  | 54.49            | 61.01  | 57.57 | 68.78            | 34.47 | 45.93 | 17.63           | 43.75  | 25.13 | 42.87   |
|                   | Emoticons       | 14.66  | 100.00           | 0.94   | 1.87  | 88.89            | 1.96  | 3.83  | 11.93           | 100.00 | 21.31 | 9.00    |
|                   | Emoticons DS    | 37.90  | 37.90            | 100.00 | 54.97 | 0.00             | 0.00  | 0.00  | 0.00            | 0.00   | 0.00  | 18.32   |
|                   | NRC Hashtag     | 57.69  | 57.54            | 51.57  | 54.39 | 63.86            | 76.04 | 69.42 | 13.43           | 8.04   | 10.06 | 44.62   |
|                   | LIWC07          | 32.66  | 41.00            | 38.68  | 39.81 | 54.59            | 24.69 | 34.01 | 14.12           | 44.64  | 21.46 | 31.76   |
|                   | LIWC15          | 48.27  | 67.11            | 63.52  | 65.27 | 71.66            | 32.76 | 44.97 | 19.66           | 61.61  | 29.81 | 46.68   |
|                   | Opinion Finder  | 42.31  | 59.31            | 38.05  | 46.36 | 64.75            | 44.01 | 52.40 | 15.13           | 48.21  | 23.03 | 40.60   |
|                   | Opinion Lexicon | 54.47  | 62.76            | 67.30  | 64.95 | 72.97            | 46.21 | 56.59 | 22.59           | 48.21  | 30.77 | 50.77   |
|                   | PANAS-t         | 14.78  | 90.00            | 2.83   | 5.49  | 55.56            | 1.22  | 2.39  | 13.41           | 98.21  | 23.61 | 10.50   |
|                   | Pattern.en      | 42.43  | 56.78            | 69.81  | 62.62 | 65.04            | 19.56 | 30.08 | 16.62           | 48.21  | 24.71 | 39.14   |
|                   | SANN            | 48.87  | 60.62            | 55.66  | 58.03 | 68.27            | 45.23 | 54.41 | 17.39           | 42.86  | 24.74 | 45.73   |
|                   | SASA            | 40.52  | 51.77            | 50.63  | 51.19 | 63.80            | 34.47 | 44.76 | 12.38           | 33.93  | 18.14 | 38.03   |
|                   | Semantria       | 48.15  | 64.84            | 63.21  | 64.01 | 68.44            | 37.65 | 48.58 | 16.12           | 43.75  | 23.56 | 45.38   |
|                   | SenticNet       | 60.43  | 54.83            | 76.73  | 63.96 | 68.67            | 64.30 | 66.41 | 0.00            | 0.00   | 0.00  | 43.46   |
|                   | Sentiment140    | 25.98  | 73.49            | 19.18  | 30.42 | 68.82            | 15.65 | 25.50 | 14.03           | 83.04  | 24.00 | 26.64   |
|                   | Sentiment140_L  | 50.06  | 46.90            | 68.87  | 55.80 | 63.64            | 46.21 | 53.54 | 16.00           | 10.71  | 12.83 | 40.72   |
|                   | SentiStrength   | 33.61  | 80.45            | 33.65  | 47.45 | 75.25            | 18.58 | 29.80 | 16.36           | 88.39  | 27.62 | 34.96   |
|                   | SentiWordNet    | 36.11  | 50.15            | 51.89  | 51.00 | 55.41            | 20.05 | 29.44 | 15.47           | 50.00  | 23.63 | 34.69   |
|                   | SO-CAL          | 52.68  | 65.01            | 70.13  | 67.47 | 64.56            | 44.99 | 53.03 | 14.23           | 31.25  | 19.55 | 46.68   |
| Stanford DM       | 55.66           | 76.30  | 50.63            | 60.87  | 60.13 | 70.42            | 64.86 | 12.08 | 16.07           | 13.79  | 46.51 |         |
| Umigon            | 40.52           | 68.49  | 51.26            | 58.63  | 58.96 | 24.94            | 35.05 | 17.52 | 66.96           | 27.78  | 40.49 |         |
| VADER             | 57.45           | 60.61  | 74.53            | 66.85  | 71.86 | 51.83            | 60.23 | 21.57 | 29.46           | 24.91  | 50.66 |         |

Table 7: 3-classes experiments results with 4 datasets

| Dataset          | Method          | Accur. | Posit. Sentiment |       |       | Negat. Sentiment |       |       | Neut. Sentiment |       |       | MacroF1 |
|------------------|-----------------|--------|------------------|-------|-------|------------------|-------|-------|-----------------|-------|-------|---------|
|                  |                 |        | P                | R     | F1    | P                | R     | F1    | P               | R     | F1    |         |
| Comments<br>_YTB | AFINN           | 59.52  | 70.31            | 71.53 | 70.91 | 59.14            | 46.81 | 52.26 | 43.22           | 49.03 | 45.94 | 56.37   |
|                  | ANEW_SUB        | 54.12  | 56.36            | 85.71 | 68.00 | 54.24            | 29.20 | 37.97 | 41.77           | 19.79 | 26.86 | 44.28   |
|                  | Emolex          | 48.66  | 65.82            | 49.97 | 56.81 | 49.02            | 38.98 | 43.43 | 34.38           | 54.05 | 42.03 | 47.42   |
|                  | Emoticons       | 32.55  | 74.09            | 10.99 | 19.14 | 37.21            | 2.09  | 3.95  | 22.60           | 93.33 | 36.39 | 19.83   |
|                  | Emoticons DS    | 49.16  | 49.39            | 97.96 | 65.67 | 45.45            | 1.30  | 2.53  | 40.96           | 3.49  | 6.43  | 24.88   |
|                  | NRC Hashtag     | 50.19  | 71.46            | 57.30 | 63.60 | 36.80            | 80.18 | 50.45 | 35.16           | 14.46 | 20.49 | 44.85   |
|                  | LIWC07          | 40.97  | 52.93            | 52.67 | 52.80 | 26.79            | 16.56 | 20.47 | 30.72           | 40.21 | 34.83 | 36.03   |
|                  | LIWC15          | 61.29  | 72.73            | 74.65 | 73.68 | 64.26            | 40.55 | 49.72 | 43.99           | 54.77 | 48.79 | 57.40   |
|                  | Opinion Finder  | 42.41  | 69.84            | 30.87 | 42.82 | 41.98            | 32.07 | 36.36 | 32.85           | 70.26 | 44.77 | 41.32   |
|                  | Opinion Lexicon | 56.74  | 72.29            | 63.60 | 67.67 | 54.33            | 44.98 | 49.22 | 40.47           | 54.26 | 46.36 | 54.42   |
|                  | PANAS-t         | 29.12  | 51.72            | 0.90  | 1.77  | 46.67            | 2.74  | 5.17  | 28.68           | 98.05 | 44.38 | 17.11   |
|                  | Pattern.en      | 57.65  | 70.55            | 73.51 | 72.00 | 58.76            | 28.42 | 38.31 | 40.12           | 53.54 | 45.87 | 52.06   |
|                  | SANN            | 45.61  | 68.26            | 41.20 | 51.39 | 51.27            | 23.73 | 32.44 | 33.51           | 70.36 | 45.40 | 43.08   |
|                  | SASA            | 46.61  | 66.86            | 49.31 | 56.76 | 34.72            | 50.07 | 41.00 | 35.69           | 39.28 | 37.40 | 45.05   |
|                  | Semantria       | 54.98  | 78.85            | 56.88 | 66.09 | 52.82            | 42.76 | 47.26 | 37.73           | 61.33 | 46.72 | 53.36   |
|                  | SenticNet       | 53.86  | 65.29            | 77.60 | 70.91 | 38.34            | 68.19 | 49.08 | 31.25           | 2.05  | 3.85  | 41.28   |
|                  | Sentiment140    | 45.82  | 79.95            | 37.12 | 50.70 | 50.79            | 25.29 | 33.77 | 33.26           | 76.82 | 46.42 | 43.63   |
|                  | Sentiment140_L  | 52.48  | 62.84            | 73.03 | 67.56 | 39.96            | 57.63 | 47.20 | 35.52           | 13.33 | 19.39 | 44.71   |
|                  | SentiStrength   | 51.01  | 90.27            | 41.80 | 57.14 | 67.38            | 24.77 | 36.22 | 36.19           | 87.38 | 51.19 | 48.18   |
|                  | SentiWordNet    | 47.93  | 67.20            | 50.33 | 57.55 | 39.67            | 31.55 | 35.15 | 35.68           | 56.72 | 43.80 | 45.50   |
|                  | SO-CAL          | 57.15  | 74.11            | 62.22 | 67.65 | 54.36            | 52.02 | 53.16 | 28.65           | 52.51 | 37.07 | 52.63   |
| Stanford DM      | 47.05           | 81.84  | 47.09            | 59.78 | 32.80 | 72.49            | 45.17 | 34.88 | 26.97           | 30.42 | 45.12 |         |
| Umigon           | 57.21           | 79.34  | 62.28            | 69.78 | 44.02 | 50.85            | 47.19 | 43.00 | 53.54           | 47.69 | 54.89 |         |
| VADER            | 61.17           | 69.30  | 77.84            | 73.32 | 57.96 | 51.24            | 54.39 | 45.98 | 40.51           | 43.08 | 56.93 |         |
| Myspace          | AFINN           | 62.25  | 83.92            | 68.38 | 75.35 | 41.29            | 48.48 | 44.60 | 33.12           | 50.24 | 39.92 | 53.29   |
|                  | ANEW_SUB        | 66.09  | 72.89            | 88.46 | 79.92 | 42.35            | 27.27 | 33.18 | 29.81           | 14.98 | 19.94 | 44.35   |
|                  | Emolex          | 52.35  | 81.59            | 55.56 | 66.10 | 33.11            | 37.12 | 35.00 | 25.54           | 51.21 | 34.08 | 45.06   |
|                  | Emoticons       | 26.22  | 86.75            | 10.26 | 18.34 | 38.46            | 3.79  | 6.90  | 17.18           | 94.69 | 29.08 | 18.11   |
|                  | Emoticons DS    | 67.15  | 67.61            | 99.00 | 80.35 | 0.00             | 0.00  | 0.00  | 40.00           | 1.93  | 3.69  | 28.01   |
|                  | NRC Hashtag     | 44.19  | 86.97            | 46.58 | 60.67 | 18.55            | 83.33 | 30.34 | 31.94           | 11.11 | 16.49 | 35.83   |
|                  | LIWC07          | 54.85  | 77.20            | 63.68 | 69.79 | 27.36            | 21.97 | 24.37 | 26.69           | 45.89 | 33.75 | 42.64   |
|                  | LIWC15          | 65.42  | 85.76            | 72.93 | 78.83 | 48.98            | 36.36 | 41.74 | 34.97           | 58.45 | 43.76 | 54.78   |
|                  | Opinion Finder  | 38.71  | 85.94            | 30.48 | 45.01 | 23.02            | 24.24 | 23.62 | 24.04           | 75.85 | 36.51 | 35.04   |
|                  | Opinion Lexicon | 52.74  | 83.98            | 55.27 | 66.67 | 33.74            | 41.67 | 37.29 | 25.48           | 51.21 | 34.03 | 45.99   |
|                  | PANAS-t         | 26.80  | 97.33            | 10.40 | 18.79 | 40.00            | 3.03  | 5.63  | 21.13           | 97.58 | 34.74 | 19.72   |
|                  | Pattern.en      | 61.00  | 82.82            | 68.66 | 75.08 | 42.68            | 26.52 | 32.71 | 31.30           | 57.00 | 40.41 | 49.40   |
|                  | SANN            | 36.70  | 82.05            | 27.35 | 41.03 | 33.33            | 18.94 | 24.15 | 22.54           | 79.71 | 35.14 | 33.44   |
|                  | SASA            | 39.39  | 82.33            | 33.19 | 47.31 | 23.10            | 55.30 | 32.59 | 23.53           | 50.24 | 32.05 | 37.32   |
|                  | Semantria       | 45.73  | 85.84            | 41.45 | 55.91 | 35.29            | 31.82 | 33.47 | 24.53           | 69.08 | 36.20 | 41.86   |
|                  | SenticNet       | 57.44  | 78.57            | 72.08 | 75.19 | 22.77            | 65.91 | 33.85 | 33.33           | 2.42  | 4.50  | 37.85   |
|                  | Sentiment140    | 53.70  | 89.81            | 52.71 | 66.43 | 42.17            | 26.52 | 32.56 | 28.21           | 74.40 | 40.90 | 46.63   |
|                  | Sentiment140_L  | 63.78  | 77.37            | 80.34 | 78.83 | 31.05            | 58.33 | 40.53 | 35.94           | 11.11 | 16.97 | 45.44   |
|                  | SentiStrength   | 43.61  | 96.69            | 33.33 | 49.58 | 74.19            | 17.42 | 28.22 | 25.65           | 95.17 | 40.41 | 39.40   |
|                  | SentiWordNet    | 52.45  | 82.50            | 56.41 | 67.01 | 22.47            | 30.30 | 25.81 | 28.72           | 53.14 | 37.29 | 43.37   |
|                  | SO-CAL          | 53.99  | 85.40            | 54.99 | 66.90 | 36.21            | 47.73 | 41.18 | 21.40           | 54.59 | 30.75 | 46.27   |
| Stanford DM      | 35.35           | 89.50  | 27.92            | 42.56 | 16.64 | 76.52            | 27.33 | 33.02 | 34.30           | 33.65 | 34.52 |         |
| Umigon           | 56.29           | 88.82  | 58.83            | 70.78 | 25.76 | 51.52            | 34.34 | 33.65 | 50.72           | 40.46 | 48.53 |         |
| VADER            | 65.42           | 82.53  | 76.07            | 79.17 | 40.56 | 43.94            | 42.18 | 35.46 | 43.00           | 38.86 | 53.41 |         |
| Tweets<br>_DBT   | AFINN           | 45.06  | 35.38            | 51.37 | 41.90 | 61.16            | 37.07 | 46.16 | 43.70           | 49.32 | 46.34 | 44.80   |
|                  | ANEW_SUB        | 34.00  | 24.94            | 71.78 | 37.02 | 55.37            | 34.27 | 42.33 | 40.93           | 11.83 | 18.36 | 32.57   |
|                  | Emolex          | 40.83  | 27.79            | 42.33 | 33.55 | 58.98            | 34.19 | 43.28 | 41.80           | 46.54 | 44.04 | 40.29   |
|                  | Emoticons       | 38.57  | 29.41            | 1.37  | 2.62  | 43.75            | 0.56  | 1.11  | 27.87           | 97.86 | 43.39 | 15.70   |
|                  | Emoticons DS    | 23.32  | 22.84            | 99.86 | 37.17 | 42.11            | 0.64  | 1.26  | 66.67           | 1.43  | 2.80  | 13.75   |
|                  | NRC Hashtag     | 41.07  | 27.81            | 21.37 | 24.17 | 43.34            | 84.87 | 57.37 | 49.35           | 9.05  | 15.30 | 32.28   |
|                  | LIWC07          | 33.45  | 28.48            | 72.60 | 40.91 | 80.76            | 20.50 | 32.69 | 28.02           | 23.59 | 25.61 | 33.07   |
|                  | LIWC15          | 43.02  | 34.79            | 52.19 | 41.75 | 61.51            | 29.30 | 39.70 | 41.73           | 51.31 | 46.03 | 42.49   |
|                  | Opinion Finder  | 43.33  | 34.62            | 18.49 | 24.11 | 56.82            | 28.02 | 37.53 | 41.13           | 72.92 | 52.59 | 38.08   |
|                  | Opinion Lexicon | 47.10  | 38.73            | 49.45 | 43.44 | 61.05            | 39.15 | 47.71 | 44.85           | 53.61 | 48.84 | 46.66   |
|                  | PANAS-t         | 39.28  | 23.33            | 0.96  | 1.84  | 71.11            | 2.56  | 4.95  | 38.98           | 97.93 | 55.77 | 20.85   |
|                  | Pattern.en      | 41.29  | 32.60            | 46.85 | 38.45 | 65.85            | 19.30 | 29.85 | 41.36           | 59.89 | 48.93 | 39.07   |
|                  | SANN            | 40.89  | 30.73            | 23.70 | 26.76 | 58.48            | 19.06 | 28.74 | 40.26           | 72.52 | 51.77 | 35.76   |
|                  | SASA            | 39.87  | 30.33            | 44.79 | 36.17 | 51.29            | 33.55 | 40.56 | 40.58           | 43.29 | 41.89 | 39.54   |
|                  | Semantria       | 47.47  | 41.49            | 42.05 | 41.77 | 61.50            | 35.55 | 45.05 | 44.26           | 62.43 | 51.80 | 46.21   |
|                  | SenticNet       | 43.21  | 33.77            | 42.47 | 37.62 | 46.54            | 55.48 | 50.62 | 47.65           | 31.45 | 37.89 | 42.05   |
|                  | Sentiment140    | 41.07  | 34.81            | 13.97 | 19.94 | 63.91            | 15.45 | 24.89 | 39.16           | 82.21 | 53.05 | 32.63   |
|                  | Sentiment140_L  | 40.43  | 30.73            | 68.49 | 42.43 | 51.49            | 54.12 | 52.77 | 44.63           | 10.56 | 17.08 | 37.43   |
|                  | SentiStrength   | 43.92  | 41.36            | 12.47 | 19.16 | 64.34            | 19.22 | 29.59 | 41.25           | 86.66 | 55.89 | 34.88   |
|                  | SentiWordNet    | 39.96  | 28.41            | 33.42 | 30.71 | 52.82            | 28.50 | 37.03 | 40.70           | 55.12 | 46.83 | 38.19   |
|                  | SO-CAL          | 47.25  | 38.76            | 44.38 | 41.38 | 58.75            | 40.59 | 48.01 | 31.23           | 55.52 | 39.98 | 43.12   |
| Stanford DM      | 44.47           | 47.09  | 23.29            | 31.16 | 44.02 | 81.91            | 57.26 | 44.67 | 19.62           | 27.26 | 38.56 |         |
| Umigon           | 44.66           | 40.47  | 28.49            | 33.44 | 57.97 | 30.58            | 40.04 | 41.45 | 67.99           | 51.50 | 41.66 |         |
| VADER            | 44.81           | 33.41  | 58.49            | 42.53 | 61.83 | 41.63            | 49.76 | 45.04 | 40.03           | 42.39 | 44.89 |         |
| Tweets<br>_RND_I | AFINN           | 56.67  | 51.35            | 66.64 | 58.01 | 55.39            | 44.36 | 49.27 | 62.54           | 55.81 | 58.98 | 55.42   |
|                  | ANEW_SUB        | 41.07  | 36.48            | 92.09 | 52.25 | 49.90            | 25.40 | 33.66 | 71.01           | 13.67 | 22.93 | 36.28   |
|                  | Emolex          | 48.21  | 43.45            | 49.48 | 46.27 | 45.23            | 34.46 | 39.11 | 52.94           | 54.02 | 53.47 | 46.28   |
|                  | Emoticons       | 49.67  | 68.92            | 15.22 | 24.94 | 49.09            | 5.69  | 10.20 | 32.52           | 94.67 | 48.42 | 27.85   |
|                  | Emoticons DS    | 32.93  | 32.03            | 99.55 | 48.47 | 56.52            | 1.37  | 2.67  | 92.59           | 2.56  | 4.98  | 18.71   |
|                  | NRC Hashtag     | 38.64  | 39.51            | 63.21 | 48.62 | 32.81            | 61.96 | 42.90 | 66.67           | 10.45 | 18.06 | 36.53   |
|                  | LIWC07          | 40.74  | 34.96            | 43.36 | 38.71 | 29.89            | 17.70 | 22.24 | 48.51           | 50.13 | 49.31 | 36.75   |
|                  | LIWC15          | 59.10  | 54.56            | 70.15 | 61.38 | 64.17            | 38.88 | 48.43 | 61.63           | 61.34 | 61.48 | 57.10   |
|                  | Opinion Finder  | 54.83  | 61.57            | 31.57 | 41.74 | 50.26            | 30.56 | 38.01 | 54.16           | 82.59 | 65.42 | 48.39   |
|                  | Opinion Lexicon | 56.29  | 53.28            | 55.75 | 54.49 | 54.56            | 46.68 | 50.31 | 59.07           | 61.34 | 60.19 | 54.99   |
|                  | PANAS-t         | 47.34  | 72.09            | 4.63  | 8.70  | 50.79            | 3.37  | 6.32  | 46.76           | 98.00 | 63.31 | 26.11   |
|                  | Pattern.en      | 55.47  | 50.33            | 69.25 | 58.29 | 60.04            | 33.09 | 42.66 | 59.25           | 56.89 | 58.05 | 53.00   |
|                  | SANN            | 50.68  | 47.80            | 30.82 | 37.48 | 54.52            | 22.87 | 32.22 | 51.01           | 77.83 | 61.63 | 43.77   |
|                  | SASA            | 46.04  | 39.93            | 41.27 | 40.59 | 39.09            | 34.56 | 36.69 | 53.12           | 54.89 | 53.99 | 43.76   |
|                  | Semantria       | 57.69  | 58.84            | 52.91 | 55.72 | 54.29            | 44.05 | 48.63 | 58.23           | 67.59 | 62.56 | 55.64   |
|                  | SenticNet       | 50.24  | 49.76            | 53.51 | 51.56 | 38.36            | 58.69 | 46.40 | 63.53           | 43.88 | 51.91 | 49.96   |
|                  | Sentiment140    | 59.95  | 63.25            | 51.64 | 56.86 | 68.09            |       |       |                 |       |       |         |



Table 8: 3-classes experiments results with 4 datasets

| Dataset            | Method          | Accur. | Posit. Sentiment |        |       | Negat. Sentiment |       |       | Neut. Sentiment |       |       | MacroF1 |
|--------------------|-----------------|--------|------------------|--------|-------|------------------|-------|-------|-----------------|-------|-------|---------|
|                    |                 |        | P                | R      | F1    | P                | R     | F1    | P               | R     | F1    |         |
| Tweets<br>_RND_III | AFINN           | 64.41  | 40.81            | 72.12  | 52.13 | 49.67            | 62.50 | 55.35 | 85.95           | 62.54 | 72.40 | 59.96   |
|                    | ANEW_SUB        | 28.03  | 21.89            | 92.29  | 35.38 | 44.30            | 34.22 | 38.61 | 74.82           | 8.18  | 14.74 | 29.58   |
|                    | Emolex          | 54.76  | 31.67            | 59.95  | 41.44 | 40.14            | 47.54 | 43.53 | 77.48           | 54.64 | 64.08 | 49.68   |
|                    | Emoticons       | 70.22  | 70.06            | 16.78  | 27.07 | 65.62            | 8.61  | 15.22 | 41.29           | 97.56 | 58.02 | 33.44   |
|                    | Emoticons DS    | 20.34  | 19.78            | 99.46  | 33.00 | 62.07            | 3.69  | 6.96  | 53.85           | 0.55  | 1.09  | 13.68   |
|                    | NRC Hashtag     | 30.47  | 28.25            | 77.40  | 41.39 | 24.18            | 72.54 | 36.27 | 79.08           | 8.77  | 15.78 | 31.15   |
|                    | LIWC07          | 46.88  | 21.85            | 38.43  | 27.86 | 19.18            | 18.24 | 18.70 | 69.51           | 54.83 | 61.31 | 35.95   |
|                    | LIWC15          | 67.75  | 44.78            | 78.35  | 56.99 | 57.49            | 57.38 | 57.44 | 85.18           | 66.67 | 74.80 | 63.07   |
|                    | Opinion Finder  | 71.55  | 57.48            | 32.75  | 41.72 | 49.85            | 34.63 | 40.87 | 75.95           | 89.90 | 82.34 | 54.98   |
|                    | Opinion Lexicon | 63.86  | 40.65            | 66.17  | 50.36 | 48.84            | 56.15 | 52.24 | 81.96           | 64.66 | 72.29 | 58.30   |
|                    | PANAS-t         | 68.79  | 79.49            | 8.39   | 15.18 | 48.57            | 3.48  | 6.50  | 68.75           | 98.86 | 81.10 | 34.26   |
|                    | Pattern.en      | 59.56  | 36.20            | 77.00  | 49.24 | 52.87            | 45.29 | 48.79 | 81.75           | 57.23 | 67.33 | 55.12   |
|                    | SANN            | 66.06  | 40.60            | 36.81  | 38.61 | 44.87            | 28.69 | 35.00 | 74.54           | 81.72 | 77.97 | 50.53   |
|                    | SASA            | 55.37  | 29.42            | 54.53  | 38.22 | 42.46            | 47.34 | 44.77 | 78.30           | 57.15 | 66.08 | 49.69   |
|                    | Semantria       | 68.89  | 48.86            | 63.73  | 55.31 | 49.82            | 55.53 | 52.52 | 82.02           | 72.96 | 77.22 | 61.68   |
|                    | SenticNet       | 29.97  | 31.08            | 74.83  | 43.92 | 20.98            | 73.98 | 32.68 | 79.70           | 8.49  | 15.35 | 30.65   |
|                    | Sentiment140    | 76.40  | 64.42            | 51.69  | 57.36 | 74.75            | 45.49 | 56.56 | 79.04           | 89.50 | 83.94 | 65.95   |
|                    | Sentiment140.L  | 31.32  | 25.83            | 77.13  | 38.70 | 30.05            | 78.69 | 43.49 | 79.37           | 8.92  | 16.04 | 32.74   |
|                    | SentiStrength   | 73.80  | 70.94            | 41.95  | 52.72 | 57.53            | 25.82 | 35.64 | 75.35           | 92.26 | 82.95 | 57.10   |
|                    | SentiWordNet    | 55.85  | 37.42            | 58.19  | 45.55 | 24.04            | 35.86 | 28.78 | 79.25           | 59.00 | 67.64 | 47.33   |
|                    | SO-CAL          | 66.51  | 43.06            | 68.88  | 52.99 | 51.84            | 60.66 | 55.90 | 45.77           | 66.94 | 54.37 | 54.42   |
| Stanford DM        | 31.90           | 64.48  | 38.57            | 48.26  | 15.58 | 85.04            | 26.33 | 75.64 | 19.77           | 31.35 | 35.32 |         |
| Umigon             | 74.12           | 57.67  | 70.23            | 63.33  | 48.83 | 68.44            | 57.00 | 88.80 | 76.34           | 82.10 | 67.47 |         |
| VADER              | 60.14           | 37.69  | 81.60            | 51.56  | 48.56 | 65.57            | 55.80 | 88.96 | 52.87           | 66.32 | 57.89 |         |
| Tweets<br>_RND_IV  | AFINN           | 50.60  | 46.05            | 62.26  | 52.94 | 50.96            | 44.54 | 47.53 | 55.80           | 45.50 | 50.12 | 50.20   |
|                    | ANEW_SUB        | 39.60  | 36.06            | 88.68  | 51.27 | 45.07            | 26.89 | 33.68 | 65.79           | 11.26 | 19.23 | 34.73   |
|                    | Emolex          | 45.40  | 42.27            | 51.57  | 46.46 | 44.05            | 31.09 | 36.45 | 48.65           | 48.65 | 48.65 | 43.85   |
|                    | Emoticons       | 77.20  | 76.06            | 67.92  | 71.76 | 82.50            | 83.19 | 82.85 | 42.93           | 80.63 | 56.03 | 70.21   |
|                    | Emoticons DS    | 32.60  | 32.04            | 98.74  | 48.38 | 66.67            | 1.68  | 3.28  | 57.14           | 1.80  | 3.49  | 18.38   |
|                    | NRC Hashtag     | 36.00  | 39.27            | 61.01  | 47.78 | 29.68            | 54.62 | 38.46 | 52.94           | 8.11  | 14.06 | 33.44   |
|                    | LIWC07          | 41.00  | 37.17            | 44.65  | 40.57 | 39.76            | 27.73 | 32.67 | 44.69           | 45.50 | 45.09 | 39.44   |
|                    | LIWC15          | 64.60  | 62.15            | 83.65  | 71.31 | 62.96            | 71.43 | 66.93 | 69.54           | 47.30 | 56.30 | 64.85   |
|                    | Opinion Finder  | 49.00  | 54.26            | 32.08  | 40.32 | 38.10            | 26.89 | 31.53 | 50.31           | 72.97 | 59.56 | 43.80   |
|                    | Opinion Lexicon | 51.40  | 50.53            | 59.75  | 54.76 | 47.66            | 42.86 | 45.13 | 54.15           | 50.00 | 51.99 | 50.63   |
|                    | PANAS-t         | 46.00  | 53.85            | 4.40   | 8.14  | 40.00            | 5.04  | 8.96  | 45.97           | 97.75 | 62.54 | 26.54   |
|                    | Pattern.en      | 67.20  | 58.02            | 88.68  | 70.15 | 72.66            | 78.15 | 75.30 | 79.07           | 45.95 | 58.12 | 67.86   |
|                    | SANN            | 44.80  | 40.00            | 28.93  | 33.58 | 47.92            | 19.33 | 27.54 | 45.99           | 69.82 | 55.46 | 38.86   |
|                    | SASA            | 44.40  | 39.11            | 44.03  | 41.42 | 39.05            | 34.45 | 36.61 | 51.39           | 50.00 | 50.68 | 42.90   |
|                    | Semantria       | 64.20  | 62.15            | 69.18  | 65.48 | 63.38            | 75.63 | 68.97 | 66.85           | 54.50 | 60.05 | 64.83   |
|                    | SenticNet       | 60.60  | 59.22            | 66.67  | 62.72 | 51.98            | 77.31 | 62.16 | 72.92           | 47.30 | 57.38 | 60.75   |
|                    | Sentiment140    | 59.60  | 61.15            | 53.46  | 57.05 | 64.84            | 49.58 | 56.19 | 57.04           | 69.37 | 62.60 | 58.61   |
|                    | Sentiment140.L  | 49.00  | 44.65            | 76.10  | 56.28 | 52.63            | 84.03 | 64.72 | 61.54           | 10.81 | 18.39 | 46.46   |
|                    | SentiStrength   | 54.20  | 72.50            | 36.48  | 48.54 | 55.26            | 17.65 | 26.75 | 50.26           | 86.49 | 63.58 | 46.29   |
|                    | SentiWordNet    | 45.80  | 43.11            | 45.28  | 44.17 | 37.21            | 26.89 | 31.22 | 50.61           | 56.31 | 53.30 | 42.90   |
|                    | SO-CAL          | 54.80  | 49.43            | 54.09  | 51.65 | 53.85            | 47.06 | 50.22 | 37.29           | 59.46 | 45.83 | 49.24   |
| Stanford DM        | 35.20           | 67.86  | 35.85            | 46.91  | 26.56 | 82.35            | 40.16 | 44.68 | 9.46            | 15.61 | 34.23 |         |
| Umigon             | 74.40           | 69.84  | 83.02            | 75.86  | 65.85 | 90.76            | 76.33 | 89.80 | 59.46           | 71.54 | 74.58 |         |
| VADER              | 59.40           | 51.69  | 86.79            | 64.79  | 61.11 | 64.71            | 62.86 | 76.64 | 36.94           | 49.85 | 59.16 |         |
| Tweets<br>_SAN     | AFINN           | 58.70  | 29.77            | 61.66  | 40.15 | 45.29            | 47.90 | 46.56 | 81.19           | 60.69 | 69.46 | 52.06   |
|                    | ANEW_SUB        | 26.46  | 16.72            | 85.55  | 27.97 | 42.00            | 25.70 | 31.89 | 75.36           | 13.50 | 22.90 | 27.59   |
|                    | Emolex          | 50.58  | 21.21            | 50.67  | 29.90 | 42.83            | 36.54 | 39.43 | 74.29           | 54.01 | 62.55 | 43.96   |
|                    | Emoticons       | 67.11  | 30.17            | 6.74   | 11.02 | 52.78            | 3.32  | 6.25  | 40.69           | 96.19 | 57.19 | 24.82   |
|                    | Emoticons DS    | 16.44  | 15.03            | 96.34  | 26.01 | 26.32            | 0.87  | 1.69  | 73.42           | 2.49  | 4.81  | 10.84   |
|                    | NRC Hashtag     | 25.53  | 18.66            | 54.53  | 27.80 | 25.64            | 75.17 | 38.24 | 70.00           | 6.90  | 12.56 | 26.20   |
|                    | LIWC07          | 58.27  | 28.45            | 62.43  | 39.08 | 49.42            | 37.24 | 42.47 | 78.64           | 62.49 | 69.64 | 50.40   |
|                    | LIWC15          | 59.35  | 29.86            | 66.28  | 41.17 | 51.20            | 40.91 | 45.48 | 80.11           | 62.32 | 70.11 | 52.25   |
|                    | Opinion Finder  | 65.30  | 31.04            | 23.51  | 26.75 | 40.23            | 24.13 | 30.16 | 73.51           | 84.70 | 78.71 | 45.21   |
|                    | Opinion Lexicon | 59.96  | 31.85            | 58.00  | 41.12 | 44.69            | 49.30 | 46.88 | 79.55           | 63.01 | 70.32 | 52.77   |
|                    | PANAS-t         | 68.11  | 44.44            | 1.54   | 2.98  | 45.16            | 2.45  | 4.64  | 68.44           | 99.01 | 80.94 | 29.52   |
|                    | Pattern.en      | 55.90  | 26.48            | 65.70  | 37.74 | 53.39            | 35.84 | 42.89 | 78.08           | 58.64 | 66.98 | 49.20   |
|                    | SANN            | 60.48  | 25.87            | 31.41  | 28.37 | 34.98            | 17.31 | 23.16 | 72.04           | 77.54 | 74.69 | 42.07   |
|                    | SASA            | 51.11  | 20.67            | 36.99  | 26.52 | 23.44            | 17.13 | 19.80 | 70.29           | 62.58 | 66.21 | 37.51   |
|                    | Semantria       | 60.05  | 29.87            | 49.33  | 37.21 | 44.07            | 41.61 | 42.81 | 77.06           | 66.95 | 71.65 | 50.56   |
|                    | SenticNet       | 42.99  | 23.83            | 43.16  | 30.71 | 25.45            | 59.09 | 35.58 | 78.72           | 39.01 | 52.16 | 39.48   |
|                    | Sentiment140    | 65.62  | 32.86            | 40.08  | 36.11 | 58.67            | 35.49 | 44.23 | 75.09           | 78.70 | 76.85 | 52.40   |
|                    | Sentiment140.L  | 26.58  | 17.68            | 64.35  | 27.74 | 31.37            | 71.85 | 43.68 | 73.33           | 7.07  | 12.90 | 28.11   |
|                    | SentiStrength   | 69.63  | 46.87            | 30.25  | 36.77 | 58.41            | 23.08 | 33.08 | 73.17           | 89.80 | 80.64 | 50.16   |
|                    | SentiWordNet    | 54.38  | 24.61            | 46.05  | 32.08 | 33.85            | 34.44 | 34.14 | 76.22           | 61.12 | 67.84 | 44.69   |
|                    | SO-CAL          | 58.67  | 28.02            | 55.88  | 37.32 | 48.40            | 52.97 | 50.58 | 44.54           | 60.69 | 51.38 | 46.43   |
| Stanford DM        | 25.09           | 43.09  | 20.42            | 27.71  | 18.42 | 92.66            | 30.72 | 74.33 | 9.56            | 16.94 | 25.13 |         |
| Umigon             | 60.43           | 35.96  | 57.23            | 44.16  | 39.69 | 54.55            | 45.95 | 80.57 | 62.58           | 70.45 | 53.52 |         |
| VADER              | 55.32           | 28.15  | 71.48            | 40.39  | 45.51 | 50.52            | 47.89 | 83.89 | 52.89           | 64.88 | 51.05 |         |
| Tweets<br>_Semeval | AFINN           | 62.36  | 61.10            | 70.09  | 65.28 | 44.08            | 55.56 | 49.15 | 71.43           | 58.57 | 64.37 | 59.60   |
|                    | ANEW_SUB        | 39.51  | 38.79            | 96.31  | 55.31 | 43.50            | 23.18 | 30.24 | 57.38           | 2.31  | 4.45  | 30.00   |
|                    | Emolex          | 48.74  | 48.15            | 62.71  | 54.47 | 31.27            | 38.59 | 34.55 | 57.90           | 41.30 | 48.21 | 45.74   |
|                    | Emoticons       | 52.88  | 72.83            | 11.34  | 19.62 | 55.56            | 5.38  | 9.80  | 34.05           | 96.53 | 50.34 | 26.59   |
|                    | Emoticons DS    | 36.59  | 36.55            | 100.00 | 53.53 | 75.00            | 0.36  | 0.71  | 100.00          | 0.03  | 0.07  | 18.10   |
|                    | NRC Hashtag     | 36.95  | 42.04            | 75.03  | 53.88 | 24.57            | 56.03 | 34.16 | 53.33           | 3.70  | 6.92  | 31.65   |
|                    | LIWC07          | 39.54  | 36.52            | 42.33  | 39.21 | 15.14            | 13.02 | 14.00 | 48.64           | 44.83 | 46.66 | 33.29   |
|                    | LIWC15          | 62.56  | 59.77            | 71.03  | 64.91 | 49.04            | 42.65 | 45.62 | 68.90           | 61.84 | 65.18 | 58.57   |
|                    | Opinion Finder  | 57.63  | 67.57            | 27.94  | 39.53 | 40.75            | 33.69 | 36.89 | 58.20           | 86.06 | 69.44 | 48.62   |
|                    | Opinion Lexicon | 60.37  | 62.09            | 62.71  | 62.40 | 41.19            | 52.81 | 46.28 | 66.41           | 60.75 | 63.46 | 57.38   |
|                    | PANAS-t         | 53.08  | 90.95            | 9.04   | 16.45 | 51.56            | 3.94  | 7.33  | 51.65           | 99.01 | 67.89 | 30.55   |
|                    | Pattern.en      | 57.99  | 57.97            | 68.74  | 62.89 | 34.83            | 35.24 | 35.04 | 65.55           | 56.39 | 60.63 | 52.85   |
|                    | SANN            | 52.13  | 49.86            | 32.88  | 39.63 | 39.96            | 22.82 | 29.05 | 54.33           | 74.36 | 62.79 | 43.82   |
|                    | SASA            | 50.63  | 46.34            | 47.77  | 47.04 | 33.07            | 20.31 | 25.17 | 56.39           | 61.12 | 58.66 | 43.62   |
|                    | Semantria       | 61.54  | 67.28            | 57.35  | 61.92 | 39.57            | 52.81 | 45.24 | 65.98           | 67.03 | 66.50 | 57.89   |
|                    | SenticNet       | 49.68  | 51.85            | 1.26   | 2.46  | 29.79            | 1.67  | 3.17  | 49.82           | 98.51 | 66.17 | 23.93   |
|                    | Sentiment140    | 60.42  | 63.87            | 51.37  | 56.94 | 50.96            |       |       |                 |       |       |         |

Table 9: 3-classes experiments results with 1 dataset

| Dataset | Method          | Accur. | Posit. Sentiment |       |       | Negat. Sentiment |       |       | Neut. Sentiment |       |       | MacroF1 |
|---------|-----------------|--------|------------------|-------|-------|------------------|-------|-------|-----------------|-------|-------|---------|
|         |                 |        | P                | R     | F1    | P                | R     | F1    | P               | R     | F1    |         |
| RW      | AFINN           | 55.07  | 59.82            | 80.58 | 68.66 | 50.83            | 41.63 | 45.77 | 44.13           | 27.57 | 33.94 | 49.46   |
|         | ANEW_SUB        | 48.47  | 48.63            | 95.25 | 64.39 | 48.15            | 11.76 | 18.91 | 45.45           | 5.87  | 10.39 | 31.23   |
|         | Emolex          | 48.95  | 56.31            | 68.18 | 61.68 | 39.29            | 34.84 | 36.93 | 39.77           | 30.79 | 34.71 | 44.44   |
|         | Emoticons       | 37.28  | 65.12            | 17.36 | 27.41 | 46.15            | 5.43  | 9.72  | 24.81           | 86.22 | 38.53 | 25.22   |
|         | Emoticons DS    | 46.75  | 46.62            | 99.59 | 63.50 | 66.67            | 1.81  | 3.52  | 50.00           | 0.88  | 1.73  | 22.92   |
|         | NRC Hashtag     | 44.07  | 57.59            | 61.16 | 59.32 | 30.10            | 67.42 | 41.62 | 43.24           | 4.69  | 8.47  | 36.47   |
|         | LIWC07          | 54.02  | 59.03            | 80.37 | 68.07 | 55.46            | 29.86 | 38.82 | 41.04           | 32.26 | 36.12 | 47.67   |
|         | LIWC15          | 54.97  | 59.50            | 82.85 | 69.26 | 56.78            | 30.32 | 39.53 | 42.13           | 31.38 | 35.97 | 48.25   |
|         | Opinion Finder  | 39.39  | 56.67            | 38.64 | 45.95 | 27.86            | 42.99 | 33.81 | 34.67           | 38.12 | 36.31 | 38.69   |
|         | Opinion Lexicon | 52.10  | 59.86            | 72.11 | 65.42 | 45.16            | 44.34 | 44.75 | 39.84           | 28.74 | 33.39 | 47.85   |
|         | PANAS-t         | 34.99  | 60.61            | 8.26  | 14.55 | 30.19            | 7.24  | 11.68 | 33.44           | 90.91 | 48.90 | 25.04   |
|         | Pattern.en      | 50.48  | 59.74            | 67.15 | 63.23 | 51.69            | 20.81 | 29.68 | 38.01           | 46.04 | 41.64 | 44.85   |
|         | SANN            | 41.01  | 58.33            | 33.26 | 42.37 | 42.27            | 18.55 | 25.79 | 33.73           | 66.57 | 44.77 | 37.64   |
|         | SASA            | 41.01  | 55.28            | 41.12 | 47.16 | 30.09            | 29.41 | 29.75 | 35.11           | 48.39 | 40.69 | 39.20   |
|         | Semantria       | 52.10  | 66.75            | 56.82 | 61.38 | 48.99            | 43.89 | 46.30 | 39.68           | 50.73 | 44.53 | 50.74   |
|         | SenticNet       | 44.17  | 62.30            | 54.96 | 58.40 | 31.04            | 71.49 | 43.29 | 34.55           | 11.14 | 16.85 | 39.51   |
|         | Sentiment140    | 52.77  | 71.39            | 55.17 | 62.24 | 45.02            | 59.28 | 51.17 | 40.42           | 45.16 | 42.66 | 52.02   |
|         | Sentiment140.L  | 48.09  | 63.30            | 63.43 | 63.36 | 33.07            | 76.02 | 46.09 | 52.83           | 8.21  | 14.21 | 41.22   |
|         | SentiStrength   | 41.11  | 77.04            | 21.49 | 33.60 | 45.57            | 16.29 | 24.00 | 34.86           | 85.04 | 49.45 | 35.68   |
|         | SentiWordNet    | 46.27  | 57.01            | 63.02 | 59.86 | 31.03            | 40.72 | 35.23 | 40.27           | 26.10 | 31.67 | 42.25   |
|         | SO-CAL          | 49.24  | 63.07            | 62.81 | 62.94 | 36.89            | 54.75 | 44.08 | 27.61           | 26.39 | 26.99 | 44.67   |
|         | Stanford DM     | 31.74  | 78.57            | 15.91 | 26.46 | 24.10            | 90.95 | 38.10 | 47.37           | 15.84 | 23.74 | 29.43   |
|         | Umigon          | 41.78  | 70.59            | 39.67 | 50.79 | 27.73            | 67.87 | 39.37 | 40.77           | 27.86 | 33.10 | 41.09   |
| VADER   | 55.16           | 57.92  | 87.60            | 69.74 | 51.41 | 41.18            | 45.73 | 45.26 | 18.18           | 25.94 | 47.14 |         |

Table 10: 2-classes experiments - Plain Lexicons (Without Vader’s Heuristics)

| Dataset           | Method          | Accur. | Posit. Sentiment |        |       | Negat. Sentiment |       |       | MacroF1 | Coverage |
|-------------------|-----------------|--------|------------------|--------|-------|------------------|-------|-------|---------|----------|
|                   |                 |        | P                | R      | F1    | P                | R     | F1    |         |          |
| Comments<br>_BBC  | AFINN           | 63.94  | 21.40            | 77.78  | 33.56 | 95.47            | 62.11 | 75.26 | 54.41   | 71.54    |
|                   | ANEW_SUB        | 28.99  | 14.91            | 95.83  | 25.81 | 96.88            | 19.11 | 31.92 | 28.86   | 99.07    |
|                   | Emolex          | 79.07  | 29.25            | 61.43  | 39.63 | 94.36            | 81.29 | 87.34 | 63.49   | 83.24    |
|                   | Emoticons DS    | 12.92  | 12.80            | 100.00 | 22.70 | 100.00           | 0.15  | 0.31  | 11.50   | 98.80    |
|                   | NRC Hashtag     | 86.22  | 29.27            | 15.79  | 20.51 | 89.91            | 95.16 | 92.46 | 56.49   | 89.76    |
|                   | Opinion Lexicon | 75.00  | 27.91            | 90.57  | 42.67 | 98.55            | 73.22 | 84.01 | 63.34   | 68.62    |
|                   | PANAS-t         | 58.82  | 17.02            | 72.73  | 27.59 | 94.55            | 57.14 | 71.23 | 49.41   | 13.56    |
|                   | Sentiment140    | 57.43  | 17.82            | 65.96  | 28.05 | 91.98            | 56.20 | 69.77 | 48.91   | 99.34    |
|                   | SentiWordNet    | 49.11  | 17.17            | 82.22  | 28.41 | 94.70            | 44.48 | 60.53 | 44.47   | 97.47    |
| Comments<br>_Digg | AFINN           | 68.00  | 44.03            | 86.99  | 58.47 | 93.10            | 61.36 | 73.97 | 66.22   | 60.74    |
|                   | ANEW_SUB        | 39.63  | 29.76            | 93.94  | 45.20 | 90.16            | 20.04 | 32.79 | 38.99   | 95.52    |
|                   | Emolex          | 71.48  | 34.29            | 45.28  | 39.02 | 84.97            | 78.10 | 81.39 | 60.21   | 67.26    |
|                   | Emoticons DS    | 26.39  | 26.12            | 99.48  | 41.38 | 75.00            | 0.55  | 1.09  | 21.24   | 94.50    |
|                   | NRC Hashtag     | 79.20  | 42.31            | 19.64  | 26.83 | 82.86            | 93.55 | 87.88 | 57.35   | 73.79    |
|                   | Opinion Lexicon | 68.62  | 42.06            | 85.71  | 56.43 | 93.45            | 63.31 | 75.49 | 65.96   | 56.65    |
|                   | PANAS-t         | 68.09  | 26.32            | 83.33  | 40.00 | 96.43            | 65.85 | 78.26 | 59.13   | 6.01     |
|                   | Sentiment140    | 65.33  | 39.56            | 66.15  | 49.51 | 84.74            | 65.05 | 73.60 | 61.56   | 95.52    |
|                   | SentiWordNet    | 56.40  | 33.59            | 71.04  | 45.61 | 83.64            | 51.33 | 63.62 | 54.61   | 90.92    |
| Comments<br>_NYT  | AFINN           | 72.34  | 64.26            | 81.24  | 71.76 | 82.08            | 65.55 | 72.89 | 72.32   | 44.58    |
|                   | ANEW_SUB        | 55.25  | 49.96            | 92.18  | 64.80 | 80.09            | 25.41 | 38.58 | 51.69   | 97.82    |
|                   | Emolex          | 59.57  | 55.11            | 47.09  | 50.79 | 62.28            | 69.50 | 65.69 | 58.24   | 65.81    |
|                   | Emoticons DS    | 45.14  | 44.95            | 100.00 | 62.02 | 100.00           | 0.64  | 1.26  | 31.64   | 97.86    |
|                   | NRC Hashtag     | 60.94  | 57.79            | 25.39  | 35.28 | 61.65            | 86.61 | 72.03 | 53.66   | 74.65    |
|                   | Opinion Lexicon | 74.06  | 66.61            | 78.86  | 72.22 | 81.69            | 70.47 | 75.67 | 73.94   | 48.32    |
|                   | PANAS-t         | 60.93  | 58.93            | 63.46  | 61.11 | 63.11            | 58.56 | 60.75 | 60.93   | 4.35     |
|                   | Sentiment140    | 61.87  | 56.43            | 63.45  | 59.74 | 67.34            | 60.60 | 63.79 | 61.76   | 98.79    |
|                   | SentiWordNet    | 58.00  | 52.42            | 69.63  | 59.81 | 66.24            | 48.53 | 56.01 | 57.91   | 93.29    |
| Comments<br>_TED  | AFINN           | 69.78  | 63.95            | 90.67  | 75.00 | 83.97            | 48.89 | 61.80 | 68.40   | 61.90    |
|                   | ANEW_SUB        | 52.29  | 47.46            | 92.65  | 62.77 | 79.09            | 21.32 | 33.59 | 48.18   | 99.17    |
|                   | Emolex          | 67.79  | 59.53            | 63.05  | 61.24 | 73.96            | 71.00 | 72.45 | 66.85   | 69.19    |
|                   | Emoticons DS    | 43.26  | 43.26            | 100.00 | 60.40 | 0.00             | 0.00  | 0.00  | 30.20   | 96.97    |
|                   | NRC Hashtag     | 66.67  | 55.84            | 45.50  | 50.15 | 71.31            | 79.01 | 74.96 | 62.55   | 70.56    |
|                   | Opinion Lexicon | 67.79  | 59.21            | 84.10  | 69.49 | 81.76            | 55.16 | 65.88 | 67.68   | 61.49    |
|                   | PANAS-t         | 81.82  | 85.19            | 85.19  | 85.19 | 76.47            | 76.47 | 76.47 | 80.83   | 6.05     |
|                   | Sentiment140    | 61.71  | 52.93            | 74.32  | 61.82 | 74.14            | 52.70 | 61.60 | 61.71   | 96.29    |
|                   | SentiWordNet    | 55.44  | 49.45            | 74.50  | 59.45 | 67.09            | 40.57 | 50.56 | 55.00   | 94.77    |
| Comments<br>_YTB  | AFINN           | 84.44  | 85.41            | 94.23  | 89.61 | 80.86            | 60.23 | 69.04 | 79.32   | 62.09    |
|                   | ANEW_SUB        | 74.81  | 74.07            | 96.90  | 83.96 | 80.82            | 27.81 | 41.38 | 62.67   | 91.57    |
|                   | Emolex          | 69.65  | 82.27            | 65.71  | 73.07 | 57.01            | 76.25 | 65.24 | 69.15   | 52.84    |
|                   | Emoticons DS    | 69.08  | 68.97            | 99.68  | 81.53 | 79.17            | 2.66  | 5.15  | 43.34   | 93.09    |
|                   | NRC Hashtag     | 60.61  | 88.66            | 39.24  | 54.40 | 50.50            | 92.51 | 65.33 | 59.87   | 61.60    |
|                   | Opinion Lexicon | 82.79  | 85.63            | 89.73  | 87.64 | 75.76            | 68.07 | 71.71 | 79.67   | 51.85    |
|                   | PANAS-t         | 78.57  | 80.41            | 87.64  | 83.87 | 74.42            | 62.75 | 68.09 | 75.98   | 5.76     |
|                   | Sentiment140    | 69.32  | 79.85            | 72.64  | 76.08 | 52.79            | 62.53 | 57.25 | 66.66   | 90.87    |
|                   | SentiWordNet    | 70.74  | 77.24            | 80.72  | 78.94 | 54.83            | 49.60 | 52.09 | 65.52   | 80.67    |
| Reviews<br>_I     | AFINN           | 65.43  | 62.85            | 82.54  | 71.36 | 71.05            | 46.75 | 56.40 | 63.88   | 64.35    |
|                   | ANEW_SUB        | 55.49  | 53.16            | 93.05  | 67.67 | 71.93            | 17.85 | 28.60 | 48.13   | 98.68    |
|                   | Emolex          | 58.81  | 61.67            | 47.15  | 53.44 | 57.03            | 70.53 | 63.07 | 58.25   | 80.22    |
|                   | Emoticons DS    | 50.08  | 50.06            | 100.00 | 66.72 | 100.00           | 0.11  | 0.23  | 33.47   | 99.91    |
|                   | NRC Hashtag     | 60.21  | 66.79            | 34.04  | 45.09 | 58.08            | 84.37 | 68.80 | 56.95   | 63.71    |
|                   | Opinion Lexicon | 69.34  | 68.78            | 74.75  | 71.64 | 70.07            | 63.53 | 66.64 | 69.14   | 73.20    |
|                   | PANAS-t         | 63.10  | 68.95            | 67.24  | 68.08 | 55.32            | 57.26 | 56.27 | 62.18   | 8.41     |
|                   | Sentiment140    | 61.11  | 57.51            | 85.33  | 68.71 | 71.50            | 36.87 | 48.65 | 58.68   | 99.90    |
|                   | SentiWordNet    | 57.78  | 56.76            | 67.93  | 61.84 | 59.33            | 47.48 | 52.75 | 57.30   | 95.39    |
| Reviews<br>_II    | AFINN           | 64.36  | 61.96            | 81.24  | 70.30 | 69.47            | 46.11 | 55.43 | 62.87   | 59.25    |
|                   | ANEW_SUB        | 55.15  | 52.73            | 93.59  | 67.46 | 73.15            | 17.21 | 27.87 | 47.66   | 99.05    |
|                   | Emolex          | 59.08  | 61.47            | 48.46  | 54.20 | 57.53            | 69.68 | 63.02 | 58.61   | 73.40    |
|                   | Emoticons DS    | 50.04  | 49.92            | 99.98  | 66.59 | 96.30            | 0.49  | 0.98  | 33.79   | 99.05    |
|                   | NRC Hashtag     | 59.57  | 65.77            | 34.03  | 44.85 | 57.51            | 83.44 | 68.09 | 56.47   | 65.79    |
|                   | Opinion Lexicon | 67.60  | 67.39            | 74.07  | 70.57 | 67.89            | 60.47 | 63.97 | 67.27   | 67.55    |
|                   | PANAS-t         | 65.03  | 70.65            | 68.89  | 69.76 | 57.55            | 59.57 | 58.54 | 64.15   | 8.47     |
|                   | Sentiment140    | 62.11  | 59.05            | 77.21  | 66.92 | 67.76            | 47.21 | 55.65 | 61.29   | 99.11    |
|                   | SentiWordNet    | 57.92  | 56.53            | 68.20  | 61.82 | 60.02            | 47.66 | 53.13 | 57.48   | 95.77    |
| Myspace           | AFINN           | 87.80  | 94.63            | 90.97  | 92.76 | 55.32            | 68.42 | 61.18 | 76.97   | 64.87    |
|                   | ANEW_SUB        | 86.36  | 87.83            | 97.24  | 92.30 | 66.67            | 29.03 | 40.45 | 66.37   | 93.17    |
|                   | Emolex          | 65.48  | 93.07            | 62.50  | 74.78 | 31.75            | 78.95 | 45.28 | 60.03   | 50.36    |
|                   | Emoticons DS    | 84.30  | 84.56            | 99.56  | 91.45 | 50.00            | 2.36  | 4.51  | 47.98   | 97.00    |
|                   | NRC Hashtag     | 48.14  | 95.98            | 36.87  | 53.27 | 26.85            | 93.75 | 41.75 | 47.51   | 67.75    |
|                   | Opinion Lexicon | 80.85  | 92.17            | 83.82  | 87.80 | 47.37            | 67.16 | 55.56 | 71.68   | 45.08    |
|                   | PANAS-t         | 92.71  | 98.80            | 93.18  | 95.91 | 53.85            | 87.50 | 66.67 | 81.29   | 11.51    |
|                   | Sentiment140    | 76.70  | 91.23            | 79.81  | 85.14 | 37.07            | 60.80 | 46.06 | 65.60   | 91.61    |
|                   | SentiWordNet    | 73.94  | 88.35            | 79.67  | 83.79 | 27.81            | 42.73 | 33.69 | 58.74   | 85.13    |
| Amazon<br>_       | AFINN           | 74.37  | 76.25            | 88.09  | 81.75 | 68.64            | 48.71 | 56.98 | 69.36   | 49.28    |
|                   | ANEW_SUB        | 61.67  | 61.07            | 96.42  | 74.77 | 69.67            | 11.81 | 20.19 | 47.48   | 97.12    |
|                   | Emolex          | 54.79  | 68.24            | 45.05  | 54.27 | 46.07            | 69.14 | 55.30 | 54.78   | 61.02    |
|                   | Emoticons DS    | 59.72  | 59.63            | 99.71  | 74.63 | 73.91            | 1.20  | 2.36  | 38.49   | 96.76    |
|                   | NRC Hashtag     | 58.12  | 77.91            | 34.34  | 47.67 | 51.70            | 87.83 | 65.09 | 56.38   | 69.11    |
|                   | Opinion Lexicon | 75.71  | 78.79            | 86.27  | 82.36 | 67.81            | 55.47 | 61.03 | 71.69   | 54.63    |
|                   | PANAS-t         | 84.16  | 88.64            | 92.86  | 90.70 | 53.85            | 41.18 | 46.67 | 68.68   | 2.80     |
|                   | Sentiment140    | 60.87  | 73.52            | 52.59  | 61.32 | 51.65            | 72.78 | 60.42 | 60.87   | 98.98    |
|                   | SentiWordNet    | 61.22  | 64.85            | 74.60  | 69.39 | 53.56            | 42.02 | 47.09 | 58.24   | 91.63    |
| Tweets<br>_DBT    | AFINN           | 66.42  | 54.55            | 83.61  | 66.02 | 84.08            | 55.42 | 66.81 | 66.41   | 47.40    |
|                   | ANEW_SUB        | 47.85  | 38.62            | 81.73  | 52.46 | 74.79            | 29.44 | 42.25 | 47.35   | 92.72    |
|                   | Emolex          | 64.03  | 46.47            | 55.89  | 50.75 | 75.68            | 68.07 | 71.67 | 61.21   | 55.63    |
|                   | Emoticons DS    | 37.29  | 37.05            | 99.86  | 54.05 | 88.89            | 0.66  | 1.31  | 27.68   | 97.42    |
|                   | NRC Hashtag     | 70.58  | 46.38            | 25.74  | 33.10 | 75.09            | 88.27 | 81.15 | 57.13   | 66.65    |
|                   | Opinion Lexicon | 70.16  | 57.17            | 80.42  | 66.83 | 84.56            | 64.03 | 72.88 | 69.85   | 44.87    |
|                   | PANAS-t         | 78.75  | 53.33            | 84.21  | 65.31 | 94.00            | 77.05 | 84.68 | 75.00   | 4.04     |
|                   | Sentiment140    | 64.11  | 50.21            | 68.15  | 57.82 | 77.46            | 61.83 | 68.77 | 63.30   | 97.57    |
|                   | SentiWordNet    | 52.65  | 40.19            | 71.65  | 51.49 | 73.45            | 42.39 | 53.75 | 52.62   | 84.84    |

Table 11: 2-classes experiments - Plain Lexicons (Without Vader’s Heuristics)

| Dataset            | Method          | Accur. | Posit. Sentiment |        |       | Negat. Sentiment |       |       | MacroF1 | Coverage |
|--------------------|-----------------|--------|------------------|--------|-------|------------------|-------|-------|---------|----------|
|                    |                 |        | P                | R      | F1    | P                | R     | F1    |         |          |
| Tweets<br>_RND_I   | AFINN           | 81.05  | 81.02            | 91.37  | 85.88 | 81.11            | 63.39 | 71.16 | 78.52   | 60.16    |
|                    | ANEW.SUB        | 64.96  | 62.98            | 96.13  | 76.10 | 80.31            | 21.84 | 34.34 | 55.22   | 97.25    |
|                    | Emolex          | 66.25  | 75.91            | 58.77  | 66.25 | 58.77            | 75.91 | 66.25 | 66.25   | 55.26    |
|                    | Emoticons DS    | 59.61  | 59.38            | 100.00 | 74.51 | 100.00           | 1.41  | 2.78  | 38.64   | 98.43    |
|                    | NRC Hashtag     | 62.68  | 84.01            | 38.60  | 52.89 | 55.59            | 91.28 | 69.10 | 61.00   | 73.39    |
|                    | Opinion Lexicon | 80.16  | 80.74            | 86.76  | 83.64 | 79.19            | 70.88 | 74.80 | 79.22   | 49.10    |
|                    | PANAS-t         | 83.52  | 91.09            | 81.42  | 85.98 | 74.07            | 86.96 | 80.00 | 82.99   | 7.95     |
|                    | Sentiment140    | 71.66  | 77.90            | 71.89  | 74.77 | 64.38            | 71.35 | 67.68 | 71.23   | 97.90    |
| SentiWordNet       | 65.37           | 67.49  | 77.45            | 72.12  | 61.20 | 48.81            | 54.30 | 63.21 | 91.09   |          |
| Tweets<br>_RND_II  | AFINN           | 93.47  | 95.02            | 95.48  | 95.25 | 90.05            | 89.10 | 89.57 | 92.41   | 64.59    |
|                    | ANEW.SUB        | 79.66  | 78.55            | 96.79  | 86.72 | 85.74            | 42.22 | 56.58 | 71.65   | 95.14    |
|                    | Emolex          | 67.98  | 86.91            | 59.58  | 70.69 | 52.84            | 83.46 | 64.71 | 67.70   | 52.03    |
|                    | Emoticons DS    | 72.11  | 71.48            | 99.93  | 83.35 | 97.89            | 7.70  | 14.27 | 48.81   | 95.45    |
|                    | NRC Hashtag     | 56.47  | 89.05            | 37.17  | 52.45 | 44.45            | 91.67 | 59.87 | 56.16   | 67.02    |
|                    | Opinion Lexicon | 89.09  | 93.63            | 89.84  | 91.69 | 80.89            | 87.56 | 84.09 | 87.89   | 48.26    |
|                    | PANAS-t         | 88.05  | 96.09            | 85.66  | 90.57 | 76.13            | 92.91 | 83.69 | 87.13   | 9.18     |
|                    | Sentiment140    | 71.96  | 85.46            | 71.48  | 77.85 | 53.59            | 73.03 | 61.82 | 69.83   | 95.54    |
| SentiWordNet       | 53.48           | 79.67  | 44.13            | 56.80  | 37.17 | 74.59            | 49.62 | 53.21 | 94.38   |          |
| Tweets<br>_RND_III | AFINN           | 86.74  | 86.20            | 93.76  | 89.82 | 87.88            | 75.08 | 80.98 | 85.40   | 66.99    |
|                    | ANEW.SUB        | 70.96  | 67.98            | 97.60  | 80.14 | 89.57            | 30.93 | 45.98 | 63.06   | 96.25    |
|                    | Emolex          | 72.71  | 84.64            | 65.06  | 73.57 | 63.01            | 83.45 | 71.80 | 72.69   | 57.95    |
|                    | Emoticons DS    | 62.50  | 61.95            | 99.86  | 76.46 | 95.00            | 4.09  | 7.84  | 42.15   | 97.15    |
|                    | NRC Hashtag     | 70.93  | 91.32            | 49.11  | 63.87 | 62.94            | 94.88 | 75.68 | 69.78   | 70.09    |
|                    | Opinion Lexicon | 87.27  | 86.76            | 92.91  | 89.73 | 88.19            | 78.87 | 83.27 | 86.50   | 53.79    |
|                    | PANAS-t         | 90.07  | 94.12            | 92.31  | 93.20 | 79.49            | 83.78 | 81.58 | 87.39   | 11.49    |
|                    | Sentiment140    | 76.42  | 84.60            | 74.55  | 79.26 | 67.09            | 79.27 | 72.67 | 75.97   | 96.41    |
| SentiWordNet       | 70.86           | 73.98  | 80.18            | 76.96  | 64.86 | 56.47            | 60.38 | 68.67 | 88.10   |          |
| Tweets<br>_RND_IV  | AFINN           | 81.44  | 77.78            | 94.79  | 85.45 | 90.00            | 63.38 | 74.38 | 79.91   | 60.07    |
|                    | ANEW.SUB        | 61.65  | 60.78            | 92.76  | 73.44 | 67.65            | 20.18 | 31.08 | 52.26   | 95.68    |
|                    | Emolex          | 65.79  | 78.57            | 59.78  | 67.90 | 54.88            | 75.00 | 63.38 | 65.64   | 54.68    |
|                    | Emoticons DS    | 59.41  | 58.65            | 100.00 | 73.93 | 100.00           | 4.35  | 8.33  | 41.13   | 97.48    |
|                    | NRC Hashtag     | 59.00  | 72.73            | 31.37  | 43.84 | 55.13            | 87.76 | 67.72 | 55.78   | 71.94    |
|                    | Opinion Lexicon | 73.83  | 74.47            | 82.35  | 78.21 | 72.73            | 62.50 | 67.23 | 72.72   | 53.60    |
|                    | PANAS-t         | 67.50  | 73.68            | 63.64  | 68.29 | 61.90            | 72.22 | 66.67 | 67.48   | 14.39    |
|                    | Sentiment140    | 79.49  | 91.74            | 70.70  | 79.86 | 69.74            | 91.38 | 79.10 | 79.48   | 98.20    |
| SentiWordNet       | 59.76           | 62.65  | 72.73            | 67.31  | 54.12 | 42.59            | 47.67 | 57.49 | 90.29   |          |
| Tweets<br>_STF     | AFINN           | 80.67  | 76.35            | 91.13  | 83.09 | 87.78            | 69.30 | 77.45 | 80.27   | 66.30    |
|                    | ANEW.SUB        | 64.66  | 59.64            | 93.18  | 72.73 | 83.56            | 35.47 | 49.80 | 61.26   | 96.94    |
|                    | Emolex          | 67.98  | 70.79            | 61.76  | 65.97 | 65.79            | 74.26 | 69.77 | 67.87   | 56.55    |
|                    | Emoticons DS    | 53.43  | 52.75            | 100.00 | 69.07 | 100.00           | 2.98  | 5.78  | 37.43   | 97.49    |
|                    | NRC Hashtag     | 77.25  | 81.13            | 50.00  | 61.87 | 76.11            | 93.20 | 83.79 | 72.83   | 64.90    |
|                    | Opinion Lexicon | 83.33  | 77.12            | 93.81  | 84.65 | 92.50            | 73.27 | 81.77 | 83.21   | 55.15    |
|                    | PANAS-t         | 82.76  | 80.00            | 85.71  | 82.76 | 85.71            | 80.00 | 82.76 | 82.76   | 8.08     |
|                    | Sentiment140    | 76.14  | 77.38            | 73.86  | 75.58 | 75.00            | 78.41 | 76.67 | 76.12   | 98.05    |
| SentiWordNet       | 62.93           | 61.65  | 76.05            | 68.10  | 65.22 | 48.70            | 55.76 | 61.93 | 89.42   |          |
| Tweets<br>_SAN     | AFINN           | 74.23  | 68.19            | 86.45  | 76.24 | 83.53            | 63.02 | 71.84 | 74.04   | 59.40    |
|                    | ANEW.SUB        | 56.66  | 52.18            | 95.39  | 67.46 | 84.40            | 22.20 | 35.16 | 51.31   | 92.85    |
|                    | Emolex          | 70.19  | 62.44            | 63.03  | 62.74 | 75.39            | 74.92 | 75.16 | 68.95   | 48.58    |
|                    | Emoticons DS    | 47.85  | 47.59            | 99.40  | 64.36 | 72.73            | 1.45  | 2.85  | 33.60   | 95.97    |
|                    | NRC Hashtag     | 66.47  | 60.68            | 27.63  | 37.97 | 67.65            | 89.43 | 77.03 | 57.50   | 63.43    |
|                    | Opinion Lexicon | 76.33  | 71.33            | 83.26  | 76.83 | 82.46            | 70.15 | 75.81 | 76.32   | 46.47    |
|                    | PANAS-t         | 74.51  | 80.56            | 82.86  | 81.69 | 60.00            | 56.25 | 58.06 | 69.88   | 4.67     |
|                    | Sentiment140    | 69.71  | 68.70            | 65.79  | 67.21 | 70.54            | 73.20 | 71.84 | 69.53   | 96.52    |
| SentiWordNet       | 61.05           | 56.56  | 76.33            | 64.97  | 68.99 | 47.32            | 56.13 | 60.55 | 87.53   |          |
| Tweets<br>_Semeval | AFINN           | 85.88  | 89.68            | 91.68  | 90.67 | 73.55            | 68.67 | 71.03 | 80.85   | 64.58    |
|                    | ANEW.SUB        | 75.93  | 76.05            | 97.60  | 85.49 | 74.27            | 18.37 | 29.45 | 57.47   | 99.51    |
|                    | Emolex          | 65.32  | 85.02            | 60.49  | 70.69 | 46.26            | 76.14 | 57.55 | 64.12   | 55.88    |
|                    | Emoticons DS    | 72.67  | 72.66            | 100.00 | 84.17 | 100.00           | 0.12  | 0.24  | 42.20   | 99.97    |
|                    | NRC Hashtag     | 53.27  | 90.21            | 34.79  | 50.21 | 40.21            | 92.07 | 55.98 | 53.09   | 66.44    |
|                    | Opinion Lexicon | 83.43  | 89.68            | 87.13  | 88.39 | 68.64            | 73.74 | 71.10 | 79.74   | 54.05    |
|                    | PANAS-t         | 89.11  | 95.10            | 91.58  | 93.31 | 65.28            | 77.05 | 70.68 | 81.99   | 11.70    |
|                    | Sentiment140    | 71.57  | 87.15            | 71.39  | 78.49 | 48.67            | 72.04 | 58.09 | 68.29   | 100.00   |
| SentiWordNet       | 66.86           | 78.91  | 74.05            | 76.40  | 41.25 | 47.94            | 44.34 | 60.37 | 98.01   |          |
| RW                 | AFINN           | 81.85  | 83.33            | 93.75  | 88.24 | 75.27            | 50.36 | 60.34 | 74.29   | 71.91    |
|                    | ANEW.SUB        | 70.87  | 70.48            | 98.94  | 82.32 | 80.77            | 9.68  | 17.28 | 49.80   | 97.87    |
|                    | Emolex          | 51.45  | 82.42            | 37.88  | 51.91 | 37.01            | 81.88 | 50.97 | 51.44   | 73.62    |
|                    | Emoticons DS    | 69.10  | 69.01            | 100.00 | 81.66 | 100.00           | 0.92  | 1.82  | 41.74   | 99.15    |
|                    | NRC Hashtag     | 43.21  | 91.55            | 16.88  | 28.51 | 36.38            | 96.83 | 52.89 | 40.70   | 81.42    |
|                    | Opinion Lexicon | 80.25  | 84.18            | 88.96  | 86.50 | 68.38            | 58.82 | 63.24 | 74.87   | 66.81    |
|                    | PANAS-t         | 59.13  | 71.43            | 64.94  | 68.03 | 40.00            | 47.37 | 43.37 | 55.70   | 16.31    |
|                    | Sentiment140    | 69.26  | 86.55            | 65.19  | 74.37 | 50.89            | 78.08 | 61.62 | 67.99   | 98.30    |
| SentiWordNet       | 70.25           | 76.86  | 81.05            | 78.90  | 52.97 | 46.67            | 49.62 | 64.26 | 94.89   |          |

Table 12: 3-classes experiments - Plain Lexicons (Without Vader’s Heuristics)

| Dataset           | Method          | Accur. | Posit. Sentiment |       |       | Negat. Sentiment |       |       | Neut. Sentiment |       |       | MacroF1 |
|-------------------|-----------------|--------|------------------|-------|-------|------------------|-------|-------|-----------------|-------|-------|---------|
|                   |                 |        | P                | R     | F1    | P                | R     | F1    | P               | R     | F1    |         |
| Comments<br>_BBC  | AFINN           | 45.40  | 15.08            | 49.49 | 23.11 | 84.05            | 45.18 | 58.76 | 25.35           | 44.35 | 32.26 | 38.05   |
|                   | ANEW_SUB        | 22.50  | 10.98            | 92.93 | 19.64 | 84.93            | 18.99 | 31.04 | 56.25           | 3.63  | 6.82  | 19.16   |
|                   | Emolex          | 56.80  | 20.00            | 43.43 | 27.39 | 77.13            | 69.22 | 72.96 | 26.84           | 29.44 | 28.08 | 42.81   |
|                   | Emoticons DS    | 10.00  | 9.64             | 95.96 | 17.53 | 50.00            | 0.15  | 0.31  | 23.53           | 1.61  | 3.02  | 6.95    |
|                   | NRC Hashtag     | 63.80  | 19.35            | 12.12 | 14.91 | 70.81            | 87.29 | 78.19 | 29.63           | 22.58 | 25.63 | 39.58   |
|                   | Opinion Lexicon | 51.20  | 19.35            | 48.48 | 27.67 | 86.70            | 51.91 | 64.94 | 25.72           | 50.40 | 34.06 | 42.22   |
|                   | PANAS-t         | 27.90  | 13.56            | 8.08  | 10.13 | 72.22            | 7.96  | 14.34 | 20.13           | 88.31 | 32.78 | 19.09   |
|                   | Sentiment140    | 43.30  | 12.58            | 62.63 | 20.95 | 73.69            | 56.20 | 63.77 | 30.77           | 1.61  | 3.07  | 29.26   |
|                   | SentiWordNet    | 38.10  | 12.56            | 74.75 | 21.51 | 77.09            | 43.80 | 55.86 | 52.50           | 8.47  | 14.58 | 30.65   |
| Comments<br>_Digg | AFINN           | 46.61  | 32.82            | 50.95 | 39.93 | 81.51            | 37.76 | 51.61 | 26.92           | 60.68 | 37.29 | 42.94   |
|                   | ANEW_SUB        | 31.48  | 21.99            | 88.57 | 35.23 | 71.90            | 19.23 | 30.34 | 55.13           | 14.58 | 23.06 | 29.54   |
|                   | Emolex          | 48.19  | 26.23            | 22.86 | 24.43 | 66.26            | 57.34 | 61.48 | 26.38           | 48.47 | 34.17 | 40.03   |
|                   | Emoticons DS    | 20.71  | 19.18            | 91.43 | 31.71 | 60.00            | 0.52  | 1.04  | 28.28           | 9.49  | 14.21 | 15.65   |
|                   | NRC Hashtag     | 52.00  | 28.21            | 10.48 | 15.28 | 62.95            | 76.05 | 68.88 | 25.06           | 34.92 | 29.18 | 37.78   |
|                   | Opinion Lexicon | 43.92  | 30.82            | 42.86 | 35.86 | 77.26            | 37.41 | 50.41 | 24.96           | 57.29 | 34.77 | 40.35   |
|                   | PANAS-t         | 29.34  | 20.00            | 2.38  | 4.26  | 81.82            | 4.72  | 8.93  | 21.80           | 96.27 | 35.54 | 16.24   |
|                   | Sentiment140    | 47.82  | 28.16            | 60.48 | 38.43 | 64.01            | 63.11 | 63.56 | 30.34           | 9.15  | 14.06 | 38.68   |
|                   | SentiWordNet    | 43.18  | 24.62            | 61.90 | 35.23 | 65.46            | 47.38 | 54.97 | 47.41           | 21.69 | 29.77 | 39.99   |
| Comments<br>_NYT  | AFINN           | 34.57  | 62.75            | 35.16 | 45.07 | 80.79            | 29.91 | 43.65 | 6.34            | 81.56 | 11.76 | 33.50   |
|                   | ANEW_SUB        | 51.75  | 47.58            | 90.43 | 62.35 | 77.27            | 24.80 | 37.55 | 10.74           | 5.33  | 7.12  | 35.67   |
|                   | Emolex          | 39.81  | 53.09            | 30.81 | 38.99 | 60.20            | 45.95 | 52.12 | 6.53            | 52.05 | 11.60 | 34.24   |
|                   | Emoticons DS    | 42.41  | 42.92            | 98.37 | 59.77 | 100.00           | 0.62  | 1.23  | 11.59           | 6.56  | 8.38  | 23.12   |
|                   | NRC Hashtag     | 45.32  | 55.67            | 17.83 | 27.01 | 59.37            | 67.72 | 63.27 | 7.00            | 41.80 | 11.99 | 34.09   |
|                   | Opinion Lexicon | 37.96  | 65.37            | 36.57 | 46.90 | 80.27            | 35.16 | 48.90 | 7.26            | 81.97 | 13.33 | 36.38   |
|                   | PANAS-t         | 7.19   | 58.93            | 2.99  | 5.70  | 61.90            | 2.37  | 4.57  | 4.64            | 99.18 | 8.87  | 6.38    |
|                   | Sentiment140    | 58.54  | 53.50            | 62.70 | 57.74 | 64.81            | 59.85 | 62.23 | 16.67           | 6.15  | 8.98  | 42.98   |
|                   | SentiWordNet    | 52.31  | 50.10            | 65.43 | 56.75 | 63.58            | 45.00 | 52.70 | 10.51           | 15.98 | 12.68 | 40.71   |
| Comments<br>_TED  | AFINN           | 44.70  | 57.95            | 64.15 | 60.90 | 73.83            | 26.89 | 39.43 | 15.29           | 54.46 | 23.87 | 41.40   |
|                   | ANEW_SUB        | 45.05  | 40.62            | 91.19 | 56.20 | 73.73            | 21.27 | 33.02 | 14.29           | 0.89  | 1.68  | 30.30   |
|                   | Emolex          | 44.70  | 52.67            | 40.25 | 45.63 | 63.02            | 52.08 | 57.03 | 11.64           | 30.36 | 16.83 | 39.83   |
|                   | Emoticons DS    | 36.71  | 37.47            | 95.91 | 53.89 | 0.00             | 0.00  | 0.00  | 10.71           | 2.68  | 4.29  | 19.39   |
|                   | NRC Hashtag     | 45.29  | 51.81            | 27.04 | 35.54 | 60.81            | 62.59 | 61.69 | 13.10           | 33.93 | 18.91 | 38.71   |
|                   | Opinion Lexicon | 43.38  | 53.77            | 51.57 | 52.65 | 72.02            | 33.99 | 46.18 | 15.17           | 54.46 | 23.74 | 40.85   |
|                   | PANAS-t         | 17.04  | 74.19            | 7.23  | 13.18 | 72.22            | 3.18  | 6.09  | 11.93           | 95.54 | 21.21 | 13.49   |
|                   | Sentiment140    | 51.85  | 45.21            | 68.24 | 54.39 | 65.35            | 52.57 | 58.27 | 9.09            | 2.68  | 4.14  | 38.93   |
|                   | SentiWordNet    | 46.13  | 43.44            | 70.75 | 53.83 | 56.47            | 38.39 | 45.71 | 11.63           | 4.46  | 6.45  | 35.33   |
| Comments<br>_YTB  | AFINN           | 54.04  | 68.54            | 60.84 | 64.46 | 59.41            | 34.16 | 43.38 | 27.56           | 58.05 | 37.37 | 48.40   |
|                   | ANEW_SUB        | 53.45  | 54.90            | 88.17 | 67.67 | 53.08            | 25.81 | 34.74 | 43.06           | 15.90 | 23.22 | 41.87   |
|                   | Emolex          | 40.74  | 66.21            | 31.77 | 42.94 | 37.81            | 47.72 | 42.19 | 23.11           | 50.56 | 31.72 | 38.95   |
|                   | Emoticons DS    | 47.84  | 49.13            | 92.79 | 64.24 | 67.86            | 2.48  | 4.78  | 22.00           | 6.77  | 10.35 | 26.46   |
|                   | NRC Hashtag     | 36.66  | 70.40            | 21.14 | 32.52 | 34.07            | 72.49 | 46.35 | 21.10           | 34.97 | 26.32 | 35.06   |
|                   | Opinion Lexicon | 48.40  | 68.66            | 46.19 | 55.22 | 53.82            | 35.85 | 43.04 | 25.41           | 62.05 | 36.05 | 44.77   |
|                   | PANAS-t         | 30.79  | 70.27            | 4.68  | 8.78  | 49.23            | 4.17  | 7.69  | 22.52           | 96.31 | 36.50 | 17.66   |
|                   | Sentiment140    | 47.11  | 59.23            | 64.74 | 61.87 | 35.14            | 59.19 | 44.10 | 19.84           | 7.49  | 10.87 | 38.95   |
|                   | SentiWordNet    | 48.37  | 58.45            | 64.62 | 61.38 | 37.32            | 40.68 | 38.93 | 35.62           | 26.67 | 30.50 | 43.60   |
| Myspace           | AFINN           | 58.31  | 85.80            | 60.26 | 70.79 | 42.28            | 39.39 | 40.78 | 23.70           | 63.77 | 34.55 | 48.71   |
|                   | ANEW_SUB        | 67.05  | 72.74            | 90.46 | 80.63 | 42.86            | 27.27 | 33.33 | 32.14           | 13.04 | 18.56 | 44.17   |
|                   | Emolex          | 37.94  | 83.66            | 30.63 | 44.84 | 24.00            | 45.45 | 31.41 | 18.35           | 57.97 | 27.87 | 34.71   |
|                   | Emoticons DS    | 66.67  | 68.10            | 96.72 | 79.93 | 42.86            | 2.27  | 4.32  | 24.49           | 5.80  | 9.38  | 31.21   |
|                   | NRC Hashtag     | 32.95  | 83.08            | 23.79 | 36.99 | 21.00            | 79.55 | 33.23 | 17.27           | 34.30 | 22.98 | 31.06   |
|                   | Opinion Lexicon | 41.21  | 81.19            | 36.89 | 50.73 | 32.37            | 34.09 | 33.21 | 17.66           | 60.39 | 27.32 | 37.09   |
|                   | PANAS-t         | 27.76  | 95.35            | 11.68 | 20.81 | 41.18            | 5.30  | 9.40  | 17.57           | 96.62 | 29.74 | 19.98   |
|                   | Sentiment140    | 57.93  | 75.11            | 72.65 | 73.86 | 27.64            | 57.58 | 37.35 | 16.35           | 8.21  | 10.93 | 40.71   |
|                   | SentiWordNet    | 55.72  | 75.87            | 68.09 | 71.77 | 20.26            | 35.61 | 25.82 | 30.73           | 26.57 | 28.50 | 42.03   |
| Tweets<br>_DBT    | AFINN           | 42.96  | 33.85            | 41.92 | 37.45 | 60.38            | 25.38 | 35.74 | 29.80           | 61.00 | 40.04 | 37.74   |
|                   | ANEW_SUB        | 30.67  | 22.90            | 72.33 | 34.78 | 52.01            | 28.02 | 36.42 | 44.40           | 9.13  | 15.15 | 28.78   |
|                   | Emolex          | 41.48  | 28.14            | 27.95 | 28.04 | 50.25            | 40.11 | 44.61 | 29.62           | 50.68 | 37.39 | 36.68   |
|                   | Emoticons DS    | 23.78  | 22.75            | 97.40 | 36.89 | 72.73            | 0.64  | 1.27  | 33.33           | 4.05  | 7.22  | 15.13   |
|                   | NRC Hashtag     | 45.12  | 30.19            | 13.15 | 18.32 | 48.27            | 66.85 | 56.06 | 30.81           | 42.10 | 35.58 | 36.65   |
|                   | Opinion Lexicon | 45.24  | 36.88            | 36.58 | 36.73 | 61.27            | 28.50 | 38.91 | 30.34           | 66.88 | 41.75 | 39.13   |
|                   | PANAS-t         | 39.35  | 29.09            | 2.19  | 4.08  | 64.38            | 3.76  | 7.11  | 28.03           | 96.19 | 43.41 | 18.20   |
|                   | Sentiment140    | 40.21  | 29.54            | 65.07 | 40.63 | 50.26            | 61.09 | 55.15 | 36.36           | 5.08  | 8.92  | 34.90   |
|                   | SentiWordNet    | 33.51  | 23.64            | 57.81 | 33.56 | 48.53            | 36.99 | 41.98 | 40.12           | 15.97 | 22.84 | 32.79   |
| Tweets<br>_RND_I  | AFINN           | 55.09  | 52.37            | 59.25 | 55.60 | 54.30            | 33.93 | 41.76 | 36.40           | 62.52 | 46.01 | 47.79   |
|                   | ANEW_SUB        | 39.20  | 35.24            | 92.69 | 51.07 | 46.58            | 21.50 | 29.42 | 77.50           | 11.11 | 19.44 | 33.31   |
|                   | Emolex          | 48.44  | 49.41            | 31.27 | 38.30 | 36.34            | 44.15 | 39.87 | 35.19           | 62.31 | 44.98 | 41.05   |
|                   | Emoticons DS    | 33.36  | 32.29            | 99.25 | 48.73 | 86.67            | 1.37  | 2.70  | 40.00           | 3.69  | 6.75  | 19.39   |
|                   | NRC Hashtag     | 45.50  | 51.09            | 26.27 | 34.70 | 33.91            | 73.87 | 46.49 | 37.11           | 44.91 | 40.64 | 40.61   |
|                   | Opinion Lexicon | 55.82  | 55.99            | 42.54 | 48.35 | 55.91            | 34.88 | 42.96 | 35.79           | 75.12 | 48.48 | 46.60   |
|                   | PANAS-t         | 47.78  | 68.66            | 6.87  | 12.48 | 47.62            | 6.32  | 11.16 | 32.01           | 96.01 | 48.02 | 23.89   |
|                   | Sentiment140    | 41.42  | 40.20            | 70.22 | 51.13 | 39.07            | 70.07 | 50.17 | 43.14           | 7.73  | 13.11 | 38.14   |
|                   | SentiWordNet    | 41.68  | 39.31            | 69.70 | 50.27 | 34.13            | 45.21 | 38.89 | 66.50           | 20.74 | 31.62 | 40.26   |

Table 13: 3-classes experiments - Plain Lexicons (Without Vader’s Heuristics)

| Dataset            | Method          | Accur. | Posit. Sentiment |       |       | Negat. Sentiment |       |       | Neut. Sentiment |       |       | MacroF1 |
|--------------------|-----------------|--------|------------------|-------|-------|------------------|-------|-------|-----------------|-------|-------|---------|
|                    |                 |        | P                | R     | F1    | P                | R     | F1    | P               | R     | F1    |         |
| Tweets<br>_RND_III | AFINN           | 64.12  | 40.56            | 65.09 | 49.97 | 48.84            | 47.54 | 48.18 | 44.69           | 67.02 | 53.62 | 50.59   |
|                    | ANEW.SUB        | 26.78  | 21.65            | 93.64 | 35.16 | 41.01            | 29.92 | 34.60 | 78.90           | 6.76  | 12.45 | 27.40   |
|                    | Emolex          | 58.82  | 40.06            | 36.54 | 38.22 | 28.07            | 50.61 | 36.11 | 43.42           | 66.86 | 52.65 | 42.32   |
|                    | Emoticons DS    | 21.16  | 19.83            | 98.24 | 32.99 | 90.48            | 3.89  | 7.47  | 37.59           | 2.08  | 3.95  | 14.80   |
|                    | NRC Hashtag     | 50.99  | 39.46            | 29.91 | 34.03 | 25.41            | 79.71 | 38.53 | 43.87           | 51.61 | 47.43 | 40.00   |
|                    | Opinion Lexicon | 69.88  | 47.72            | 49.66 | 48.67 | 55.59            | 42.83 | 48.38 | 43.95           | 80.94 | 56.97 | 51.34   |
|                    | PANAS-t         | 69.77  | 76.80            | 12.99 | 22.22 | 55.36            | 6.35  | 11.40 | 41.09           | 98.43 | 57.98 | 30.53   |
|                    | Sentiment140    | 28.83  | 24.11            | 72.12 | 36.14 | 27.83            | 76.02 | 40.75 | 44.63           | 7.19  | 12.39 | 29.76   |
|                    | SentiWordNet    | 31.72  | 24.35            | 71.18 | 36.29 | 23.19            | 49.18 | 31.52 | 74.65           | 16.90 | 27.56 | 31.79   |
| Tweets<br>_RND_IV  | AFINN           | 49.60  | 47.64            | 57.23 | 52.00 | 52.33            | 37.82 | 43.90 | 33.43           | 50.45 | 40.22 | 45.37   |
|                    | ANEW.SUB        | 37.80  | 34.47            | 88.68 | 49.65 | 42.59            | 19.33 | 26.59 | 67.57           | 11.26 | 19.31 | 31.85   |
|                    | Emolex          | 46.00  | 49.11            | 34.59 | 40.59 | 34.09            | 37.82 | 35.86 | 33.68           | 58.56 | 42.76 | 39.74   |
|                    | Emoticons DS    | 34.40  | 32.77            | 98.11 | 49.13 | 83.33            | 4.20  | 8.00  | 37.93           | 4.95  | 8.76  | 21.97   |
|                    | NRC Hashtag     | 44.40  | 50.79            | 20.13 | 28.83 | 33.73            | 72.27 | 45.99 | 36.36           | 46.85 | 40.94 | 38.59   |
|                    | Opinion Lexicon | 52.60  | 51.85            | 44.03 | 47.62 | 48.19            | 33.61 | 39.60 | 35.17           | 68.92 | 46.58 | 44.60   |
|                    | PANAS-t         | 48.20  | 70.00            | 8.81  | 15.64 | 46.43            | 10.92 | 17.69 | 32.13           | 96.40 | 48.20 | 27.18   |
|                    | Sentiment140    | 47.00  | 44.94            | 69.81 | 54.68 | 46.09            | 89.08 | 60.74 | 43.90           | 8.11  | 13.69 | 43.04   |
|                    | SentiWordNet    | 39.20  | 35.86            | 65.41 | 46.33 | 33.58            | 38.66 | 35.94 | 63.01           | 20.72 | 31.19 | 37.82   |
| Tweets<br>_SAN     | AFINN           | 59.58  | 27.35            | 51.64 | 35.76 | 48.19            | 37.24 | 42.01 | 43.78           | 66.82 | 52.90 | 43.56   |
|                    | ANEW.SUB        | 24.47  | 16.42            | 87.67 | 27.66 | 38.26            | 20.80 | 26.95 | 77.19           | 11.32 | 19.74 | 24.78   |
|                    | Emolex          | 56.63  | 23.79            | 25.63 | 24.68 | 32.43            | 41.78 | 36.52 | 42.41           | 67.17 | 51.99 | 37.73   |
|                    | Emoticons DS    | 17.70  | 15.15            | 94.99 | 26.13 | 40.00            | 1.40  | 2.70  | 41.34           | 4.50  | 8.12  | 12.32   |
|                    | NRC Hashtag     | 46.79  | 17.23            | 13.68 | 15.25 | 26.44            | 68.01 | 38.08 | 42.56           | 48.95 | 45.53 | 32.96   |
|                    | Opinion Lexicon | 63.49  | 31.44            | 38.34 | 34.55 | 44.76            | 32.87 | 37.90 | 42.98           | 76.60 | 55.06 | 42.50   |
|                    | PANAS-t         | 67.52  | 46.77            | 5.59  | 9.98  | 18.75            | 1.57  | 2.90  | 40.69           | 97.47 | 57.42 | 23.43   |
|                    | Sentiment140    | 25.06  | 17.77            | 63.01 | 27.72 | 28.62            | 71.15 | 40.82 | 43.36           | 5.32  | 9.47  | 26.01   |
|                    | SentiWordNet    | 31.45  | 17.82            | 66.47 | 28.11 | 27.74            | 41.61 | 33.29 | 78.41           | 21.17 | 33.34 | 31.58   |
| Tweets<br>_Semeval | AFINN           | 60.05  | 59.98            | 60.95 | 60.46 | 43.51            | 40.86 | 42.14 | 39.16           | 64.68 | 48.79 | 50.46   |
|                    | ANEW.SUB        | 38.51  | 38.13            | 97.12 | 54.76 | 40.48            | 18.28 | 25.19 | 68.09           | 1.06  | 2.08  | 27.34   |
|                    | Emolex          | 46.95  | 51.66            | 32.16 | 39.65 | 24.94            | 48.03 | 32.83 | 36.03           | 57.52 | 44.31 | 38.93   |
|                    | Emoticons DS    | 36.54  | 36.53            | 99.96 | 53.50 | 50.00            | 0.12  | 0.24  | 33.33           | 0.03  | 0.07  | 17.94   |
|                    | NRC Hashtag     | 38.08  | 52.64            | 21.55 | 30.58 | 20.72            | 72.16 | 32.20 | 35.32           | 40.80 | 37.86 | 33.54   |
|                    | Opinion Lexicon | 59.91  | 63.17            | 46.92 | 53.85 | 44.17            | 40.26 | 42.12 | 38.16           | 74.89 | 50.56 | 48.84   |
|                    | PANAS-t         | 53.93  | 85.27            | 12.24 | 21.40 | 46.08            | 5.62  | 10.01 | 34.35           | 97.92 | 50.85 | 27.42   |
|                    | Sentiment140    | 35.98  | 42.97            | 71.39 | 53.65 | 25.19            | 72.04 | 37.33 | 0.00            | 0.00  | 0.00  | 30.33   |
|                    | SentiWordNet    | 34.65  | 41.64            | 72.38 | 52.87 | 19.24            | 47.31 | 27.36 | 63.03           | 3.44  | 6.52  | 28.91   |
| RW                 | AFINN           | 52.49  | 59.90            | 71.28 | 65.09 | 50.72            | 31.67 | 39.00 | 28.76           | 39.30 | 33.21 | 45.77   |
|                    | ANEW.SUB        | 48.37  | 47.85            | 96.69 | 64.02 | 58.33            | 9.50  | 16.34 | 53.12           | 4.99  | 9.12  | 29.83   |
|                    | Emolex          | 34.70  | 62.39            | 28.10 | 38.75 | 23.99            | 59.28 | 34.16 | 25.40           | 28.15 | 26.70 | 33.20   |
|                    | Emoticons DS    | 46.85  | 46.70            | 99.38 | 63.54 | 66.67            | 0.90  | 1.79  | 35.00           | 2.05  | 3.88  | 23.07   |
|                    | NRC Hashtag     | 29.25  | 69.89            | 13.43 | 22.53 | 23.95            | 82.81 | 37.16 | 23.48           | 17.01 | 19.73 | 26.47   |
|                    | Opinion Lexicon | 48.76  | 59.84            | 61.57 | 60.69 | 43.96            | 36.20 | 39.70 | 26.51           | 38.71 | 31.47 | 43.95   |
|                    | PANAS-t         | 34.80  | 53.76            | 10.33 | 17.33 | 26.87            | 8.14  | 12.50 | 25.04           | 86.80 | 38.87 | 22.90   |
|                    | Sentiment140    | 46.46  | 59.54            | 63.84 | 61.62 | 33.60            | 77.38 | 46.85 | 25.00           | 1.76  | 3.29  | 37.25   |
|                    | SentiWordNet    | 47.13  | 53.37            | 76.86 | 63.00 | 33.79            | 44.34 | 38.36 | 38.98           | 6.74  | 11.50 | 37.62   |
